# Supplementary material for: Evaluation of CORDEX ERA5-forced ‘NARCliM2.0’ regional climate models over Australia using the Weather Research and Forecasting (WRF) model version 4.1.2
Source: Copernicus journal article supplement (doi:10.5194/gmd-2024-41), 2024-04-15
Supplement: Supplementary file 1 [file gmd-2024-41-supplement.pdf]

# Evaluating CORDEX ERA5-forced 'NARClIM2.0' regional climate models over Australia: performance improvements versus ERA-Interim-forced models

## Supporting Information Figures S1-S20

Giovanni Di Virgilio<sup>1,2</sup>, F. Ji<sup>1</sup>, E. Tam<sup>1</sup>, J. P. Evans<sup>2,3</sup>, J. Kala<sup>4</sup>, J. Andrys<sup>4</sup>, C. Thomas<sup>2</sup>, D. Choudhury<sup>1</sup>, C. Rocha<sup>1</sup>, Yue Li<sup>1</sup> and M. L. Riley<sup>1</sup>

<sup>1</sup>*Climate & Atmospheric Science, NSW Department of Planning and Environment, Sydney, Australia*

<sup>2</sup>*Climate Change Research Centre, University of New South Wales, Sydney, Australia*

<sup>3</sup>*Australian Research Council Centre of Excellence for Climate Extremes, University of New South Wales, Sydney, Australia*

<sup>4</sup>*Environmental and Conservation Sciences, and Centre for Climate Impacted Terrestrial Ecosystems, Harry Butler Institute, Murdoch University, Murdoch, WA 6150, Australia*

Correspondence: Giovanni Di Virgilio ([giovanni.divirgilio@environment.nsw.gov.au](mailto:giovanni.divirgilio@environment.nsw.gov.au); [giovanni@unsw.edu.au](mailto:giovanni@unsw.edu.au))

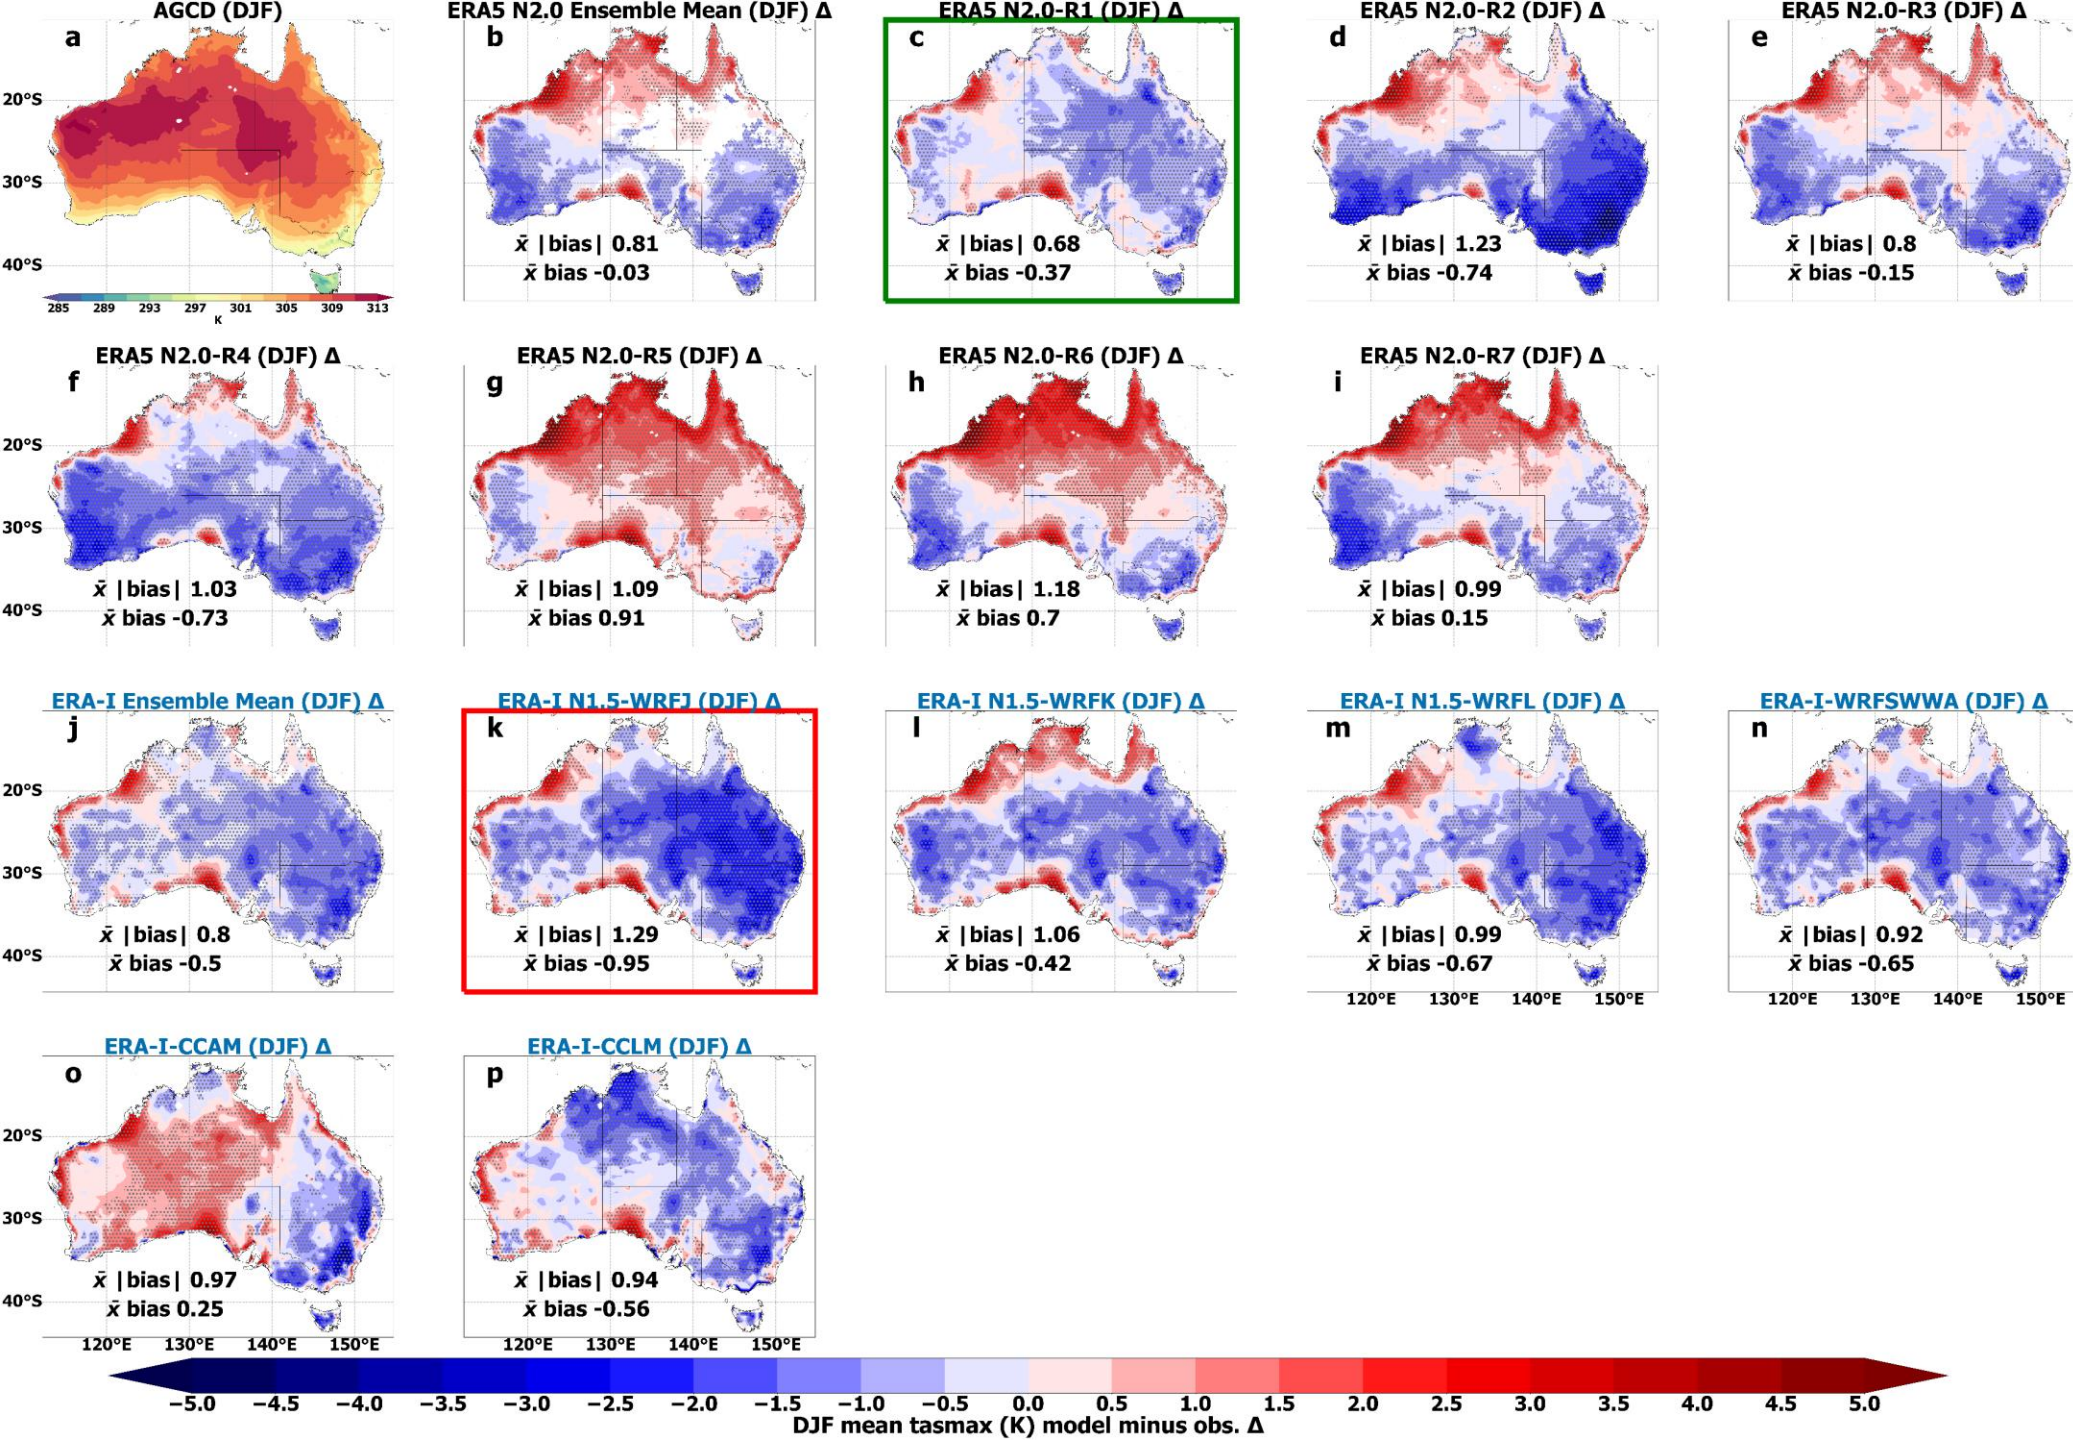

**Fig. S1** Summer (DJF) maximum temperature bias with respect to Australian Gridded Climate Data (AGCD) observations for 1981-2010. Stippled areas indicate locations where an RCM shows statistically significant bias ( $P < 0.05$ ). **b** Significance stippling for the ensemble mean bias follows Tebaldi et al. (2011) and is applied separately to each of the two RCM ensembles. Statistically insignificant areas are shown in colour, denoting that less than half of the models are significantly biased. In significant agreeing areas (stippled), at least half of RCMs are significantly biased, and at least 66% of significant RCMs in each ensemble agree on the direction of the bias. Significant disagreeing areas are shown in white, which are where at least half of the models are significantly biased and less than 66% of significant models in each ensemble agree on the bias direction - see main text for additional detail on the stippling regime. Panel boundaries in green (red) indicate the RCMs with lowest (highest) area-averaged mean absolute biases.

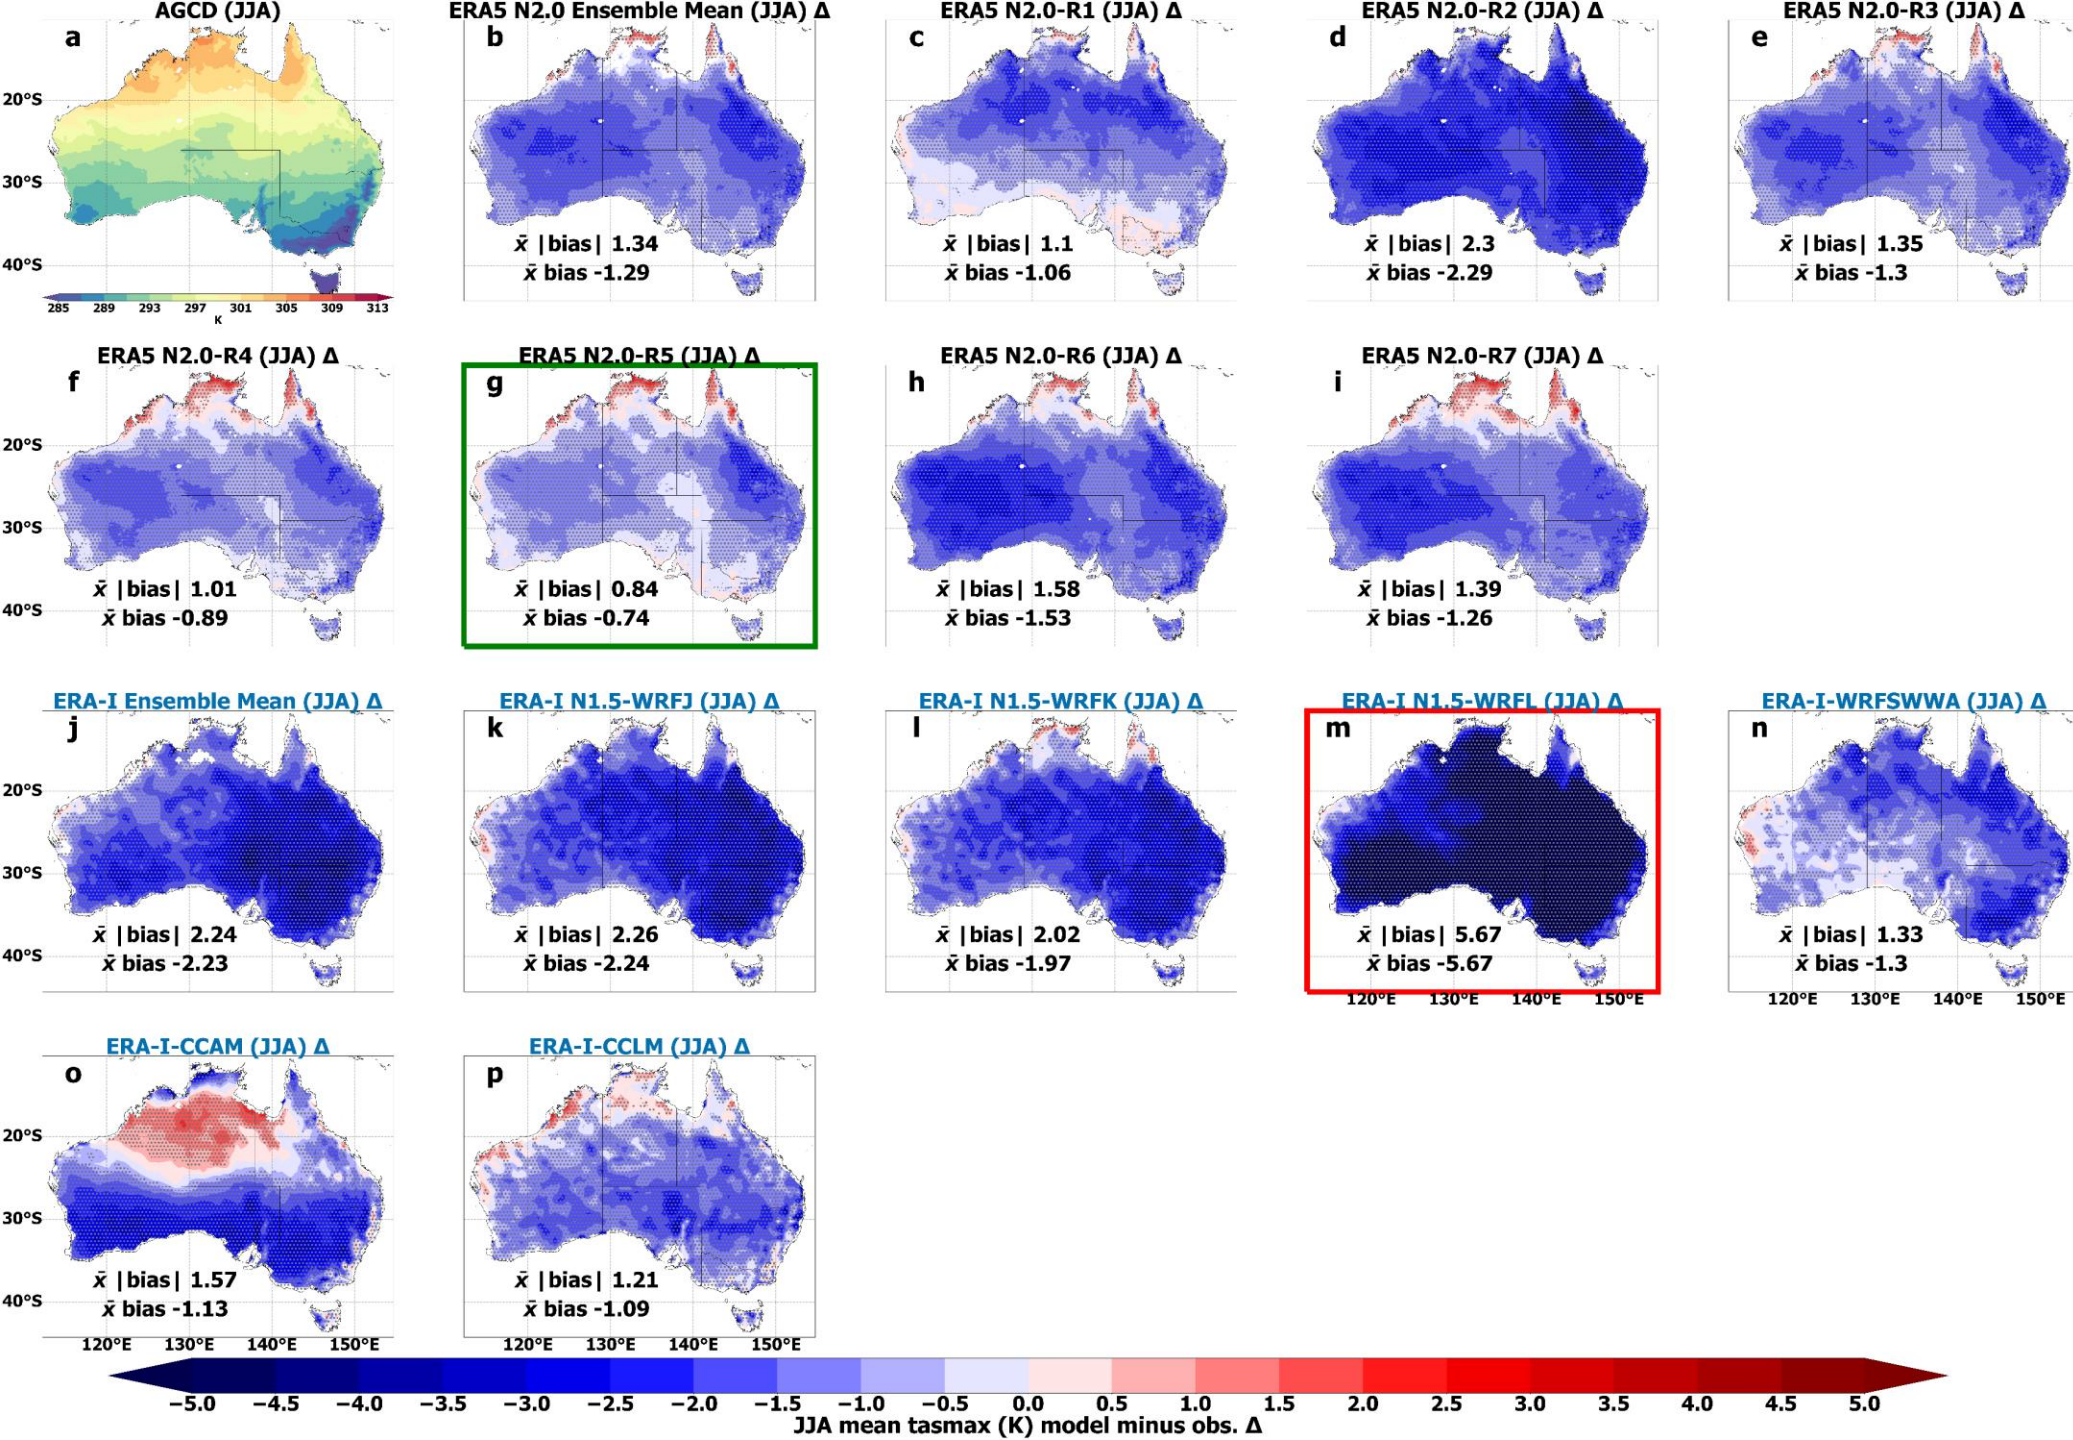

**Fig. S2** Winter (JJA) maximum temperature bias with respect to gridded observations. Stippling and panel boundary colouring as per Figure S1.

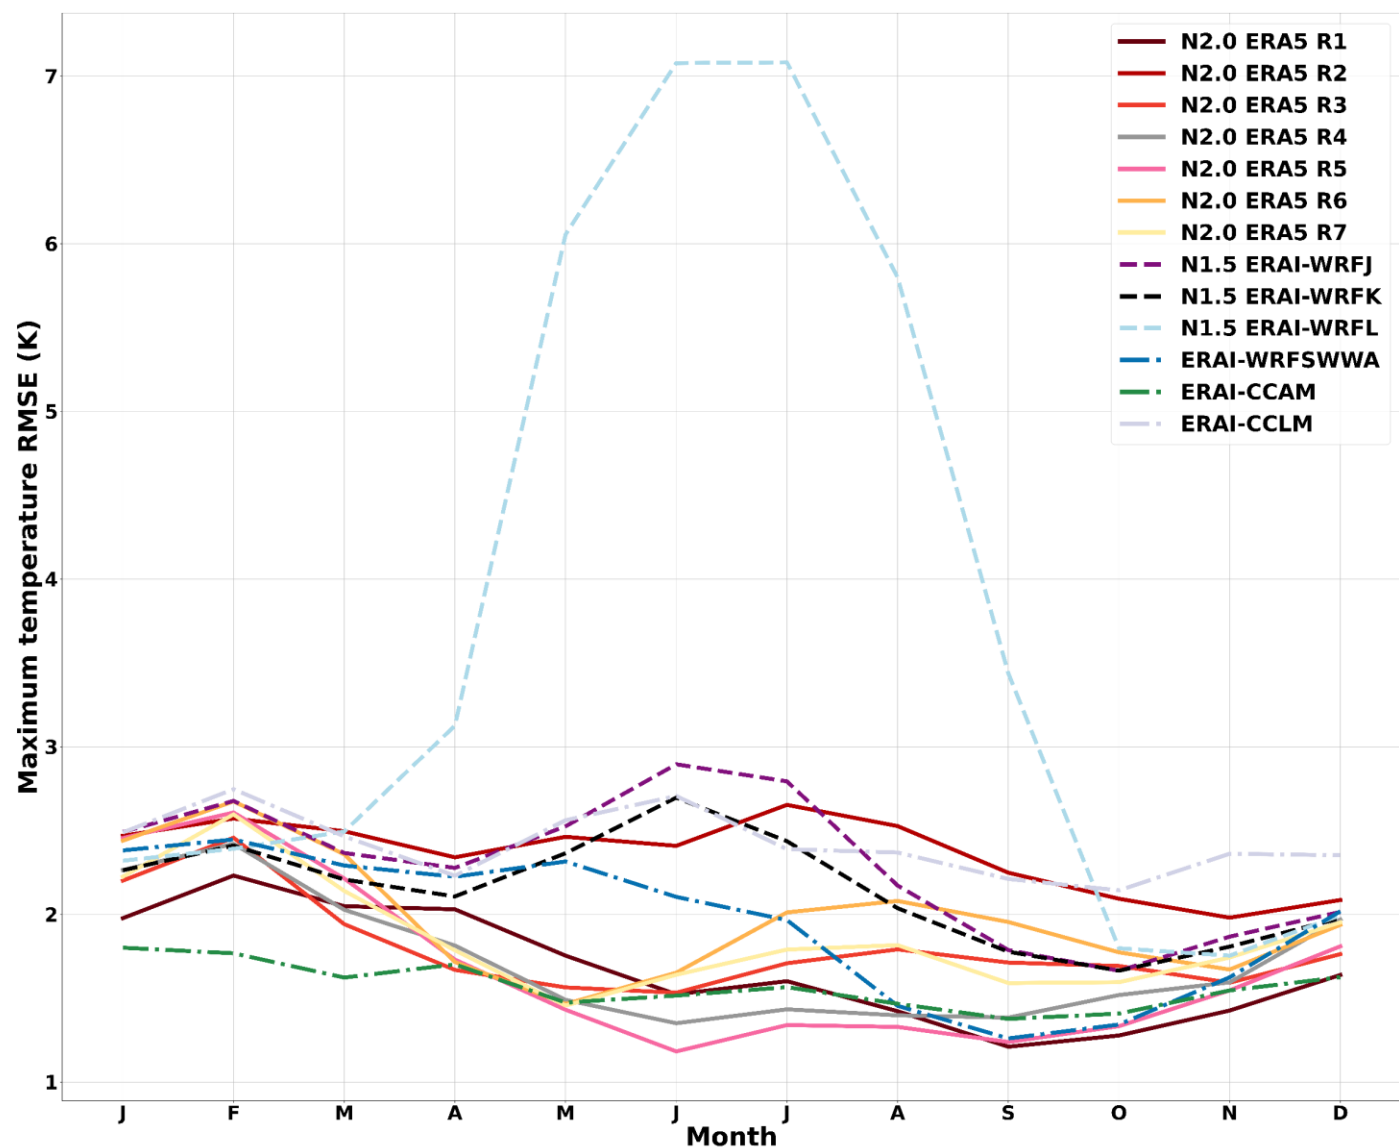

**Fig. S3** RMSE annual cycle for historical maximum near surface temperature (K) as simulated over Australia by the ERA5-forced and ERA-Interim-forced RCMs.

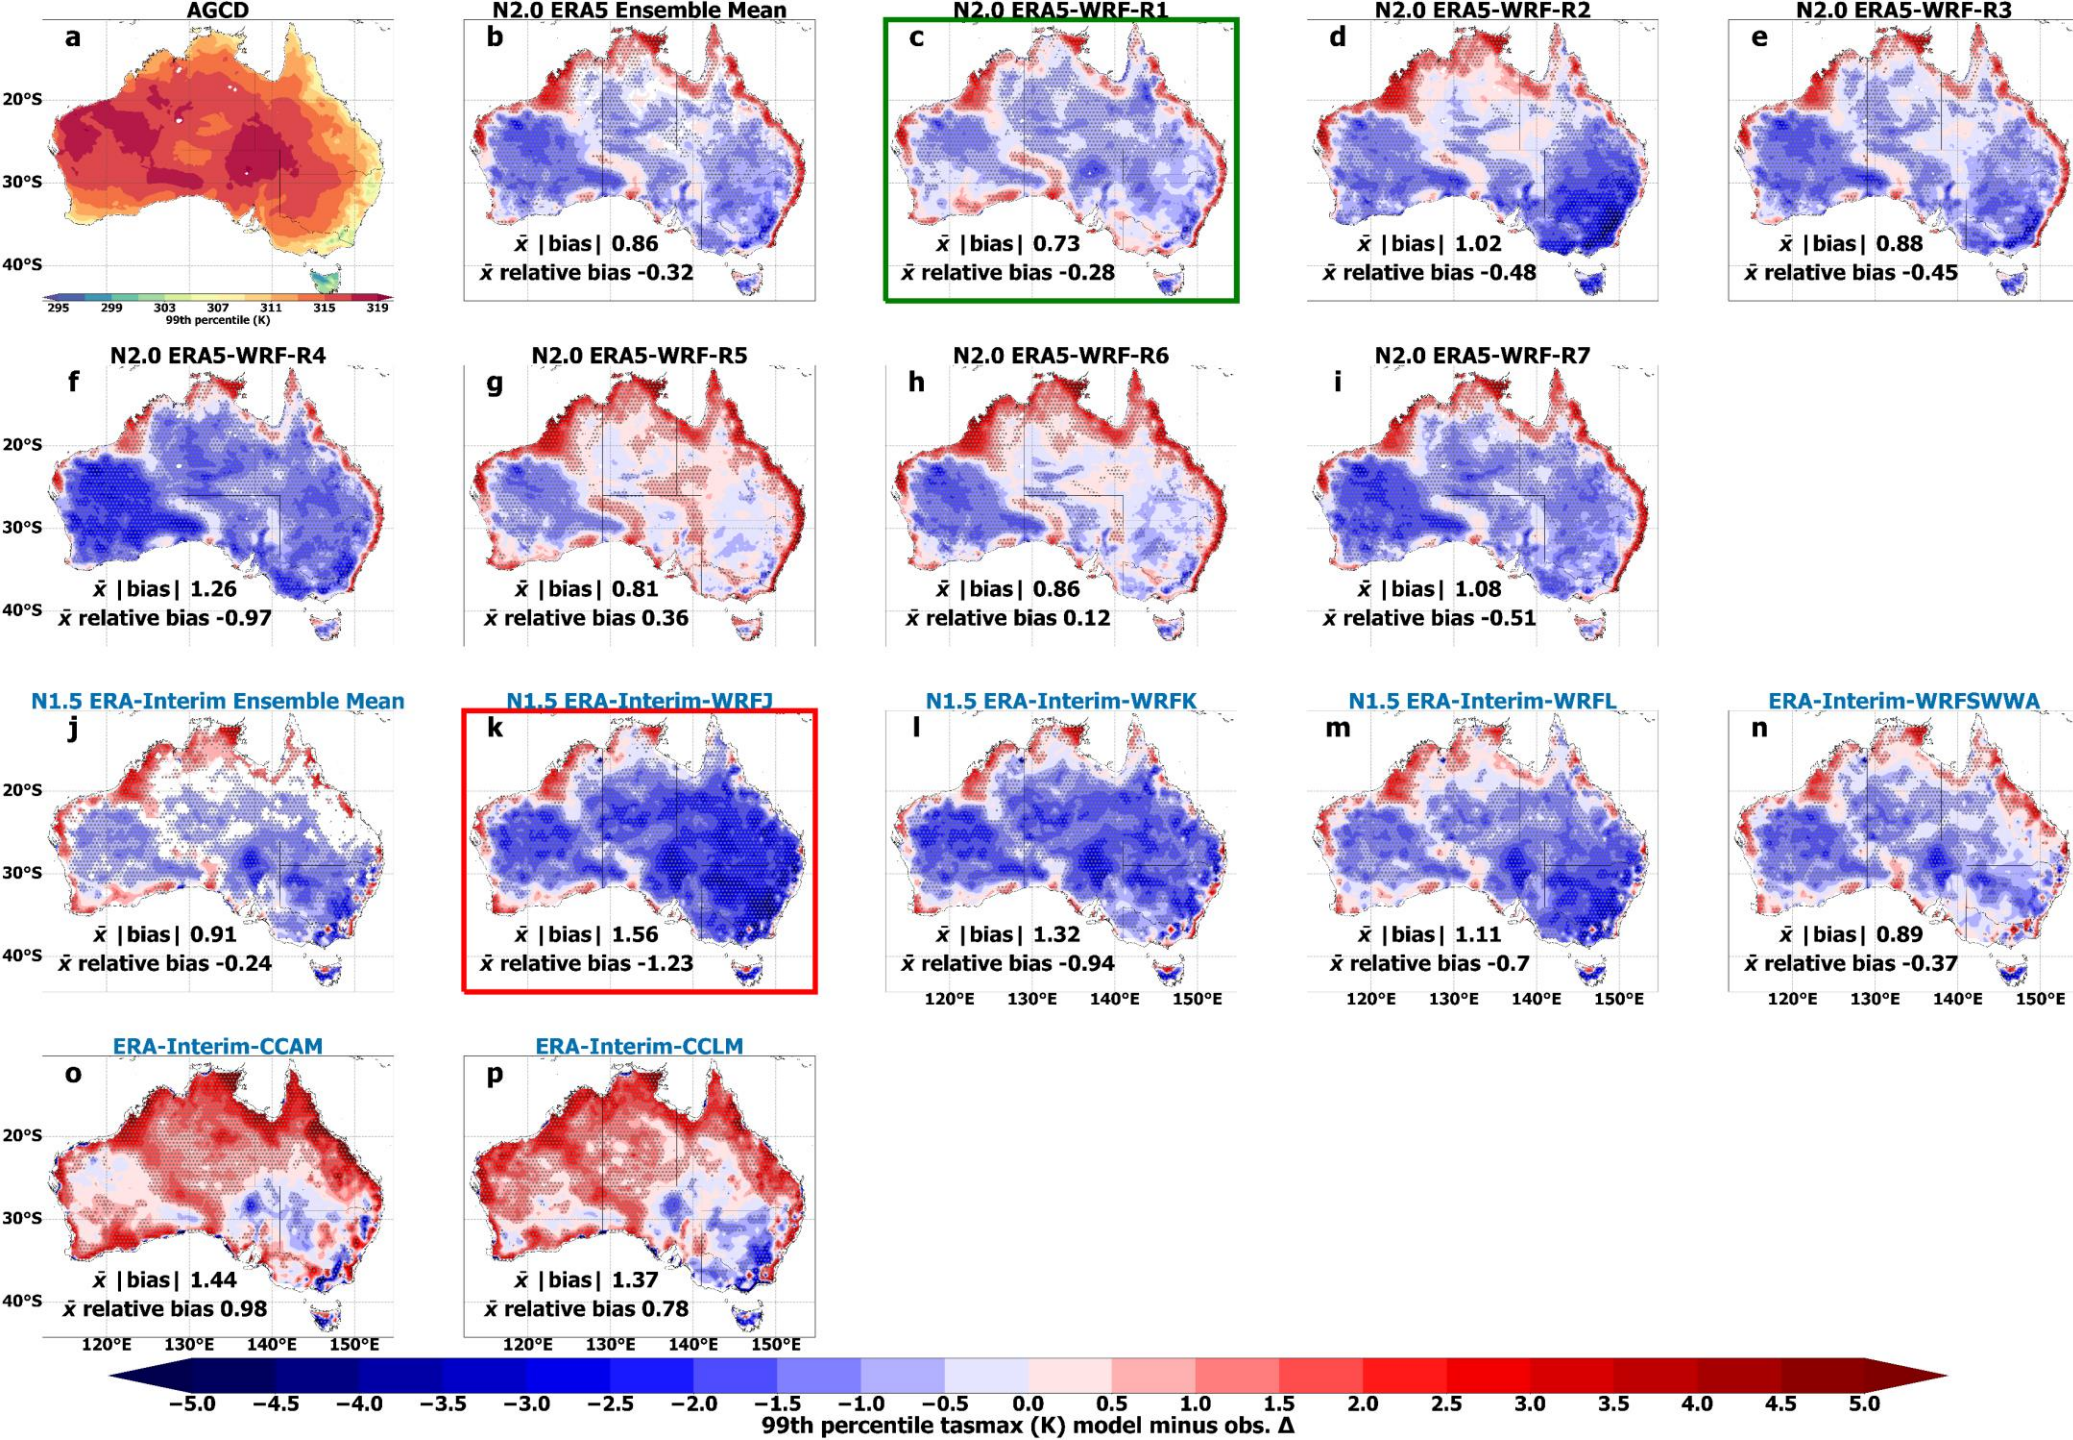

**Fig. S4** Biases in 99<sup>th</sup> percentile maximum temperatures simulated by the ERA5 and ERA-Interim forced RCMs relative to AGCD gridded observations with stippling and panel boundary colouring as per Fig. S1.

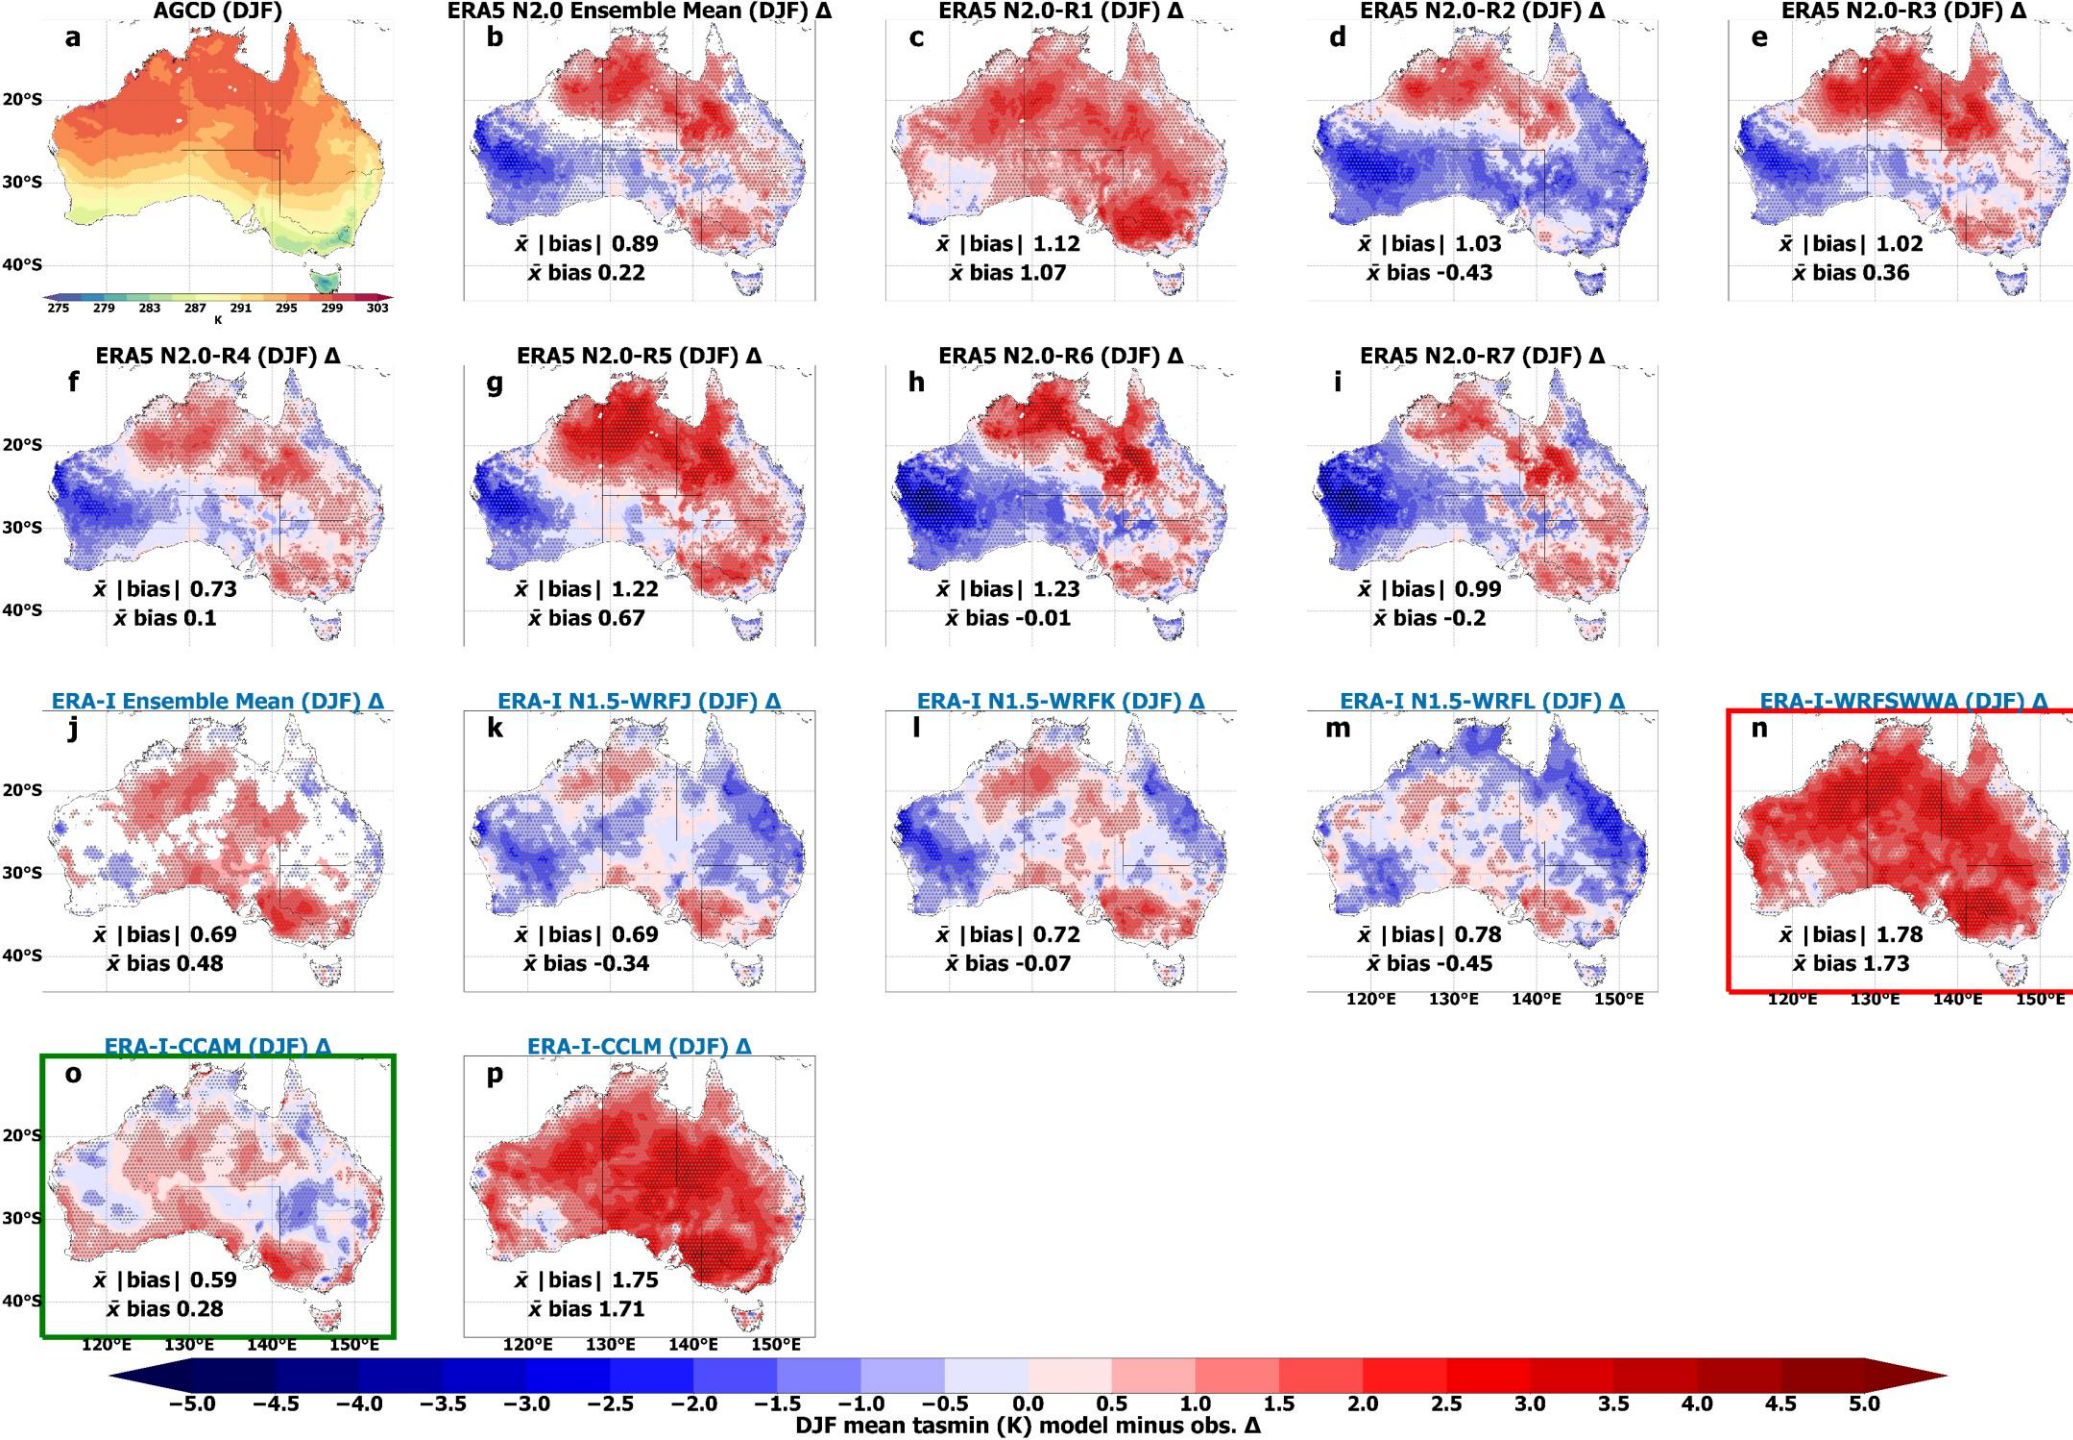

**Fig. S5** Summer (DJF) minimum temperature bias with respect to gridded observations with stippling and panel boundaries as per Fig. S1.

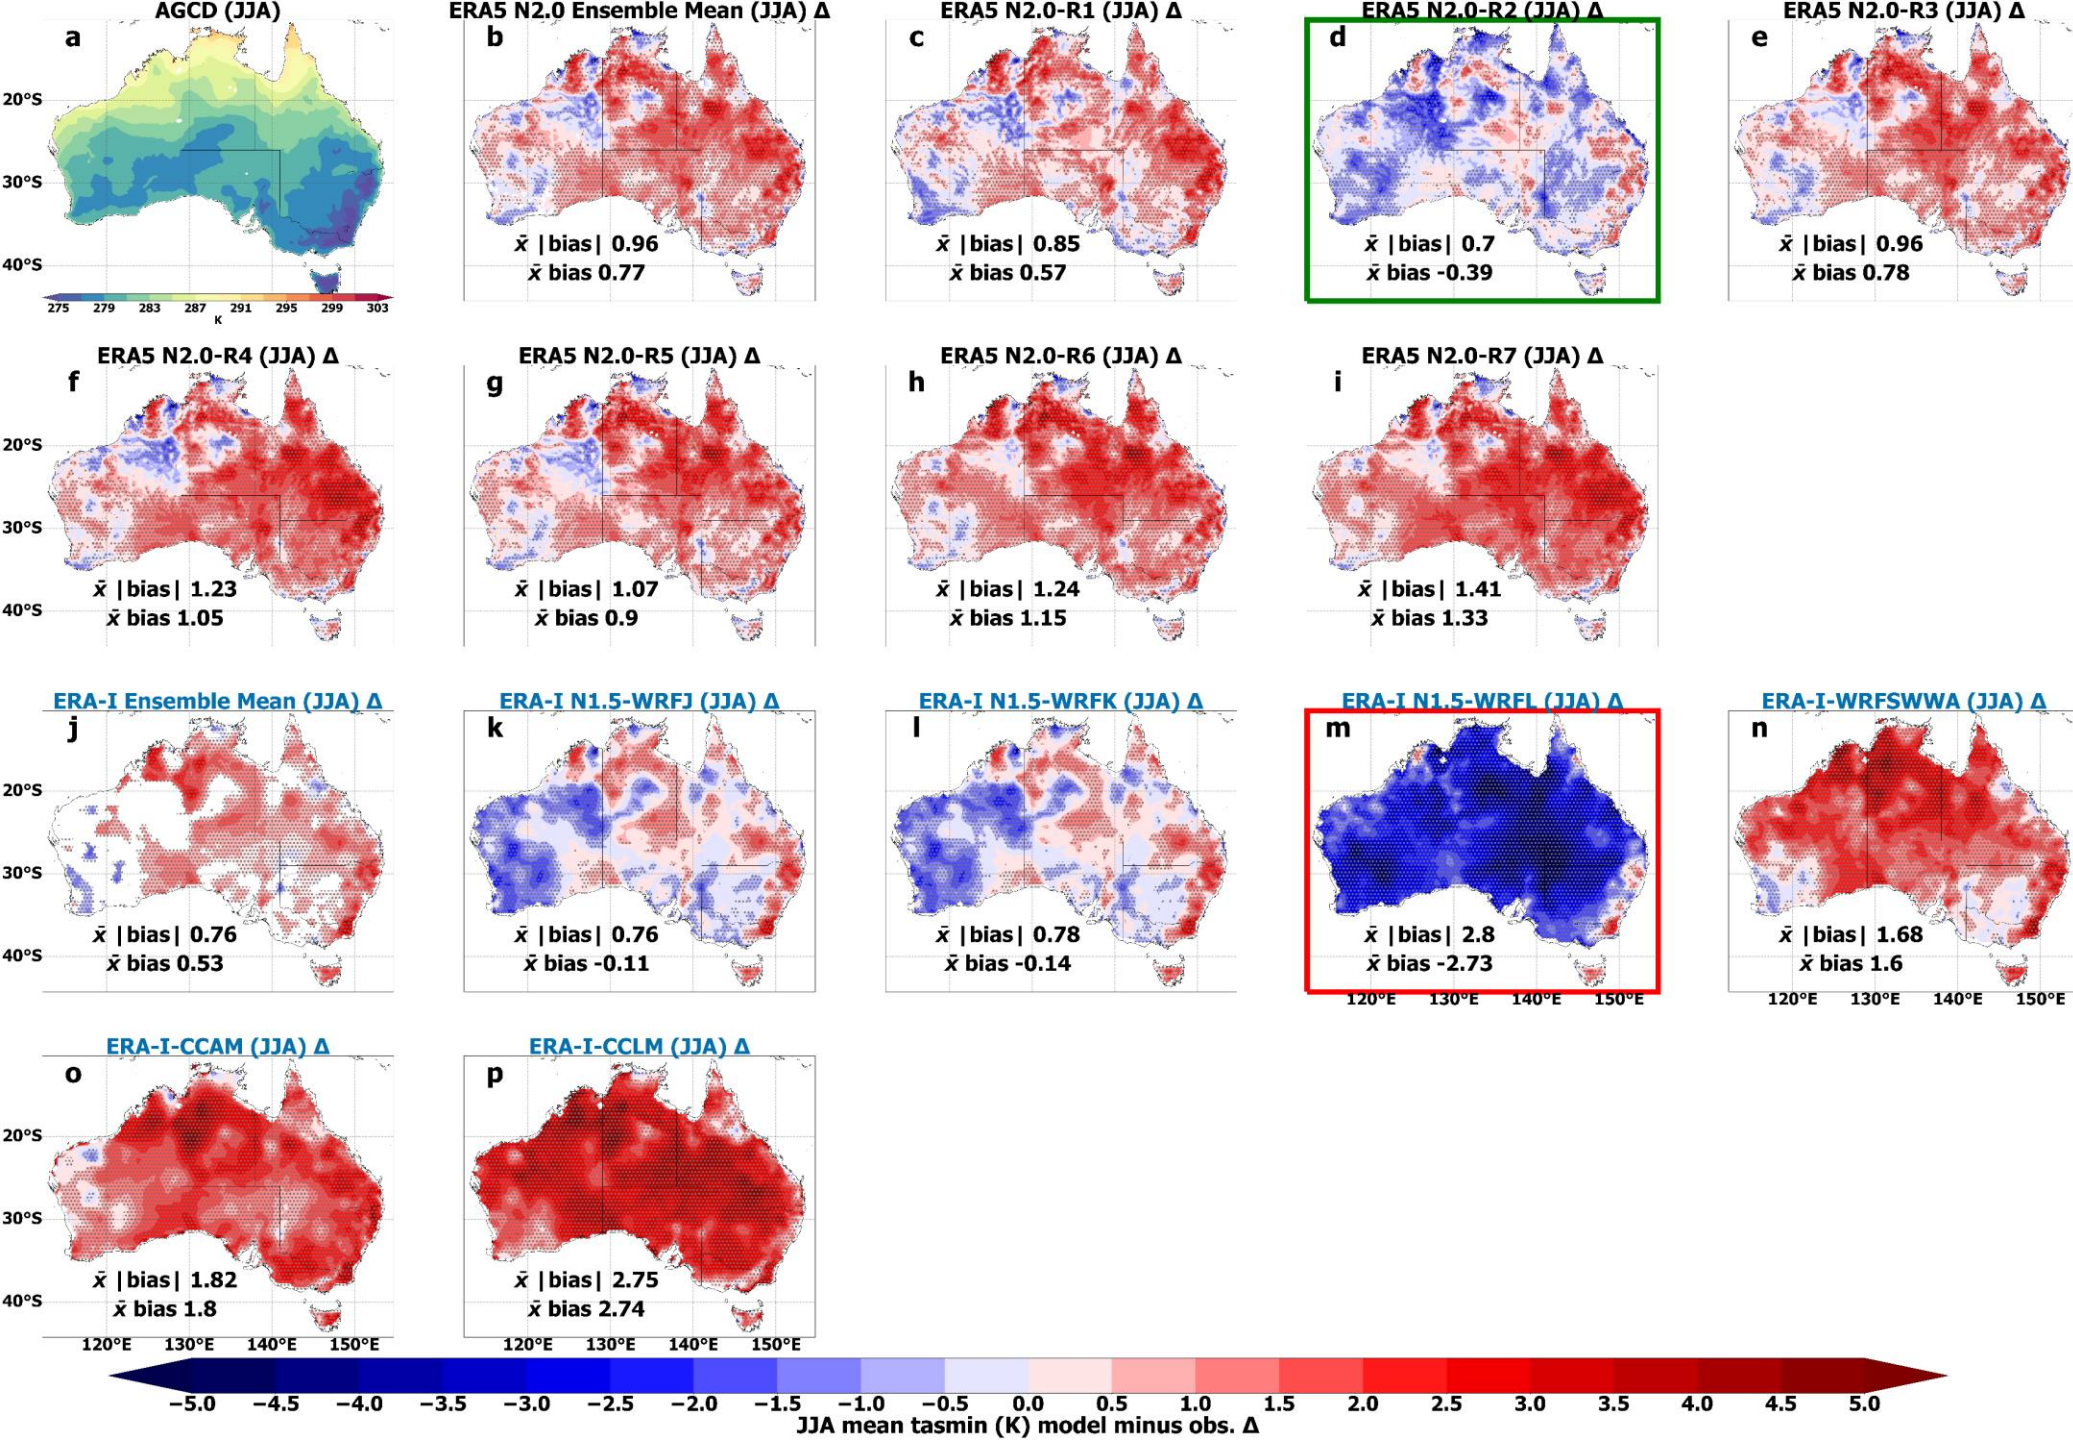

**Fig. S6** Winter (JJA) minimum temperature bias with respect to gridded observations with stippling and panel boundary colouring as per Fig. S1.

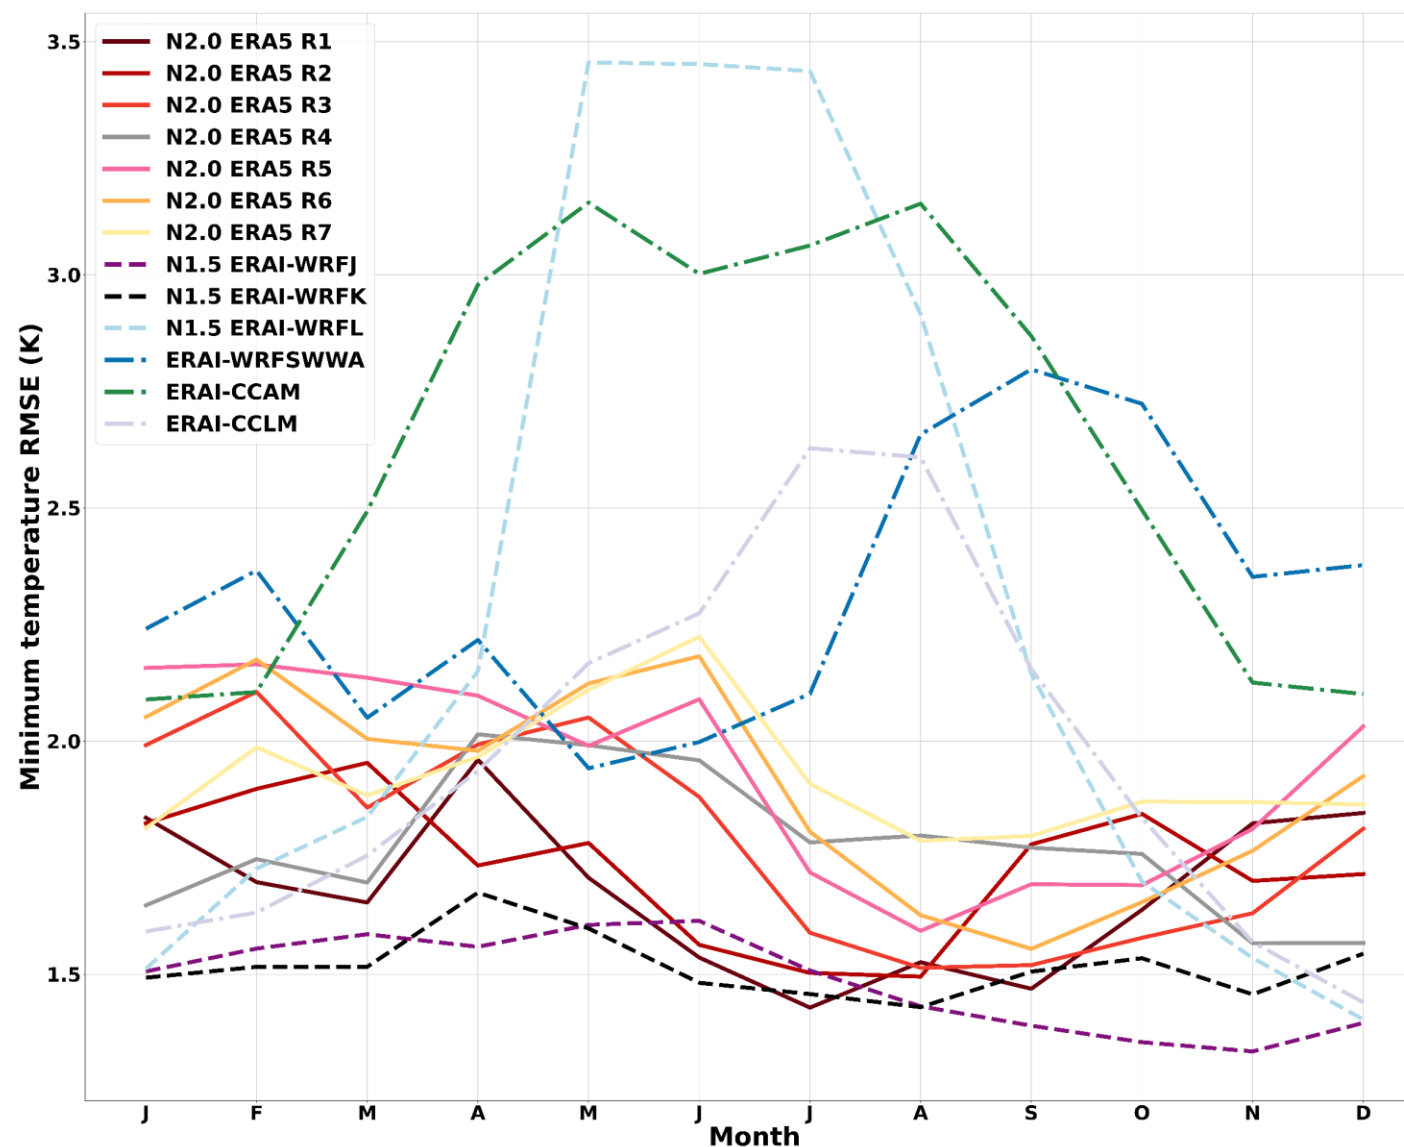

**Fig. S7** RMSE annual cycle for historical minimum near surface temperature (K) as simulated over Australia by the ERA5-forced and ERA-Interim-forced RCMs.

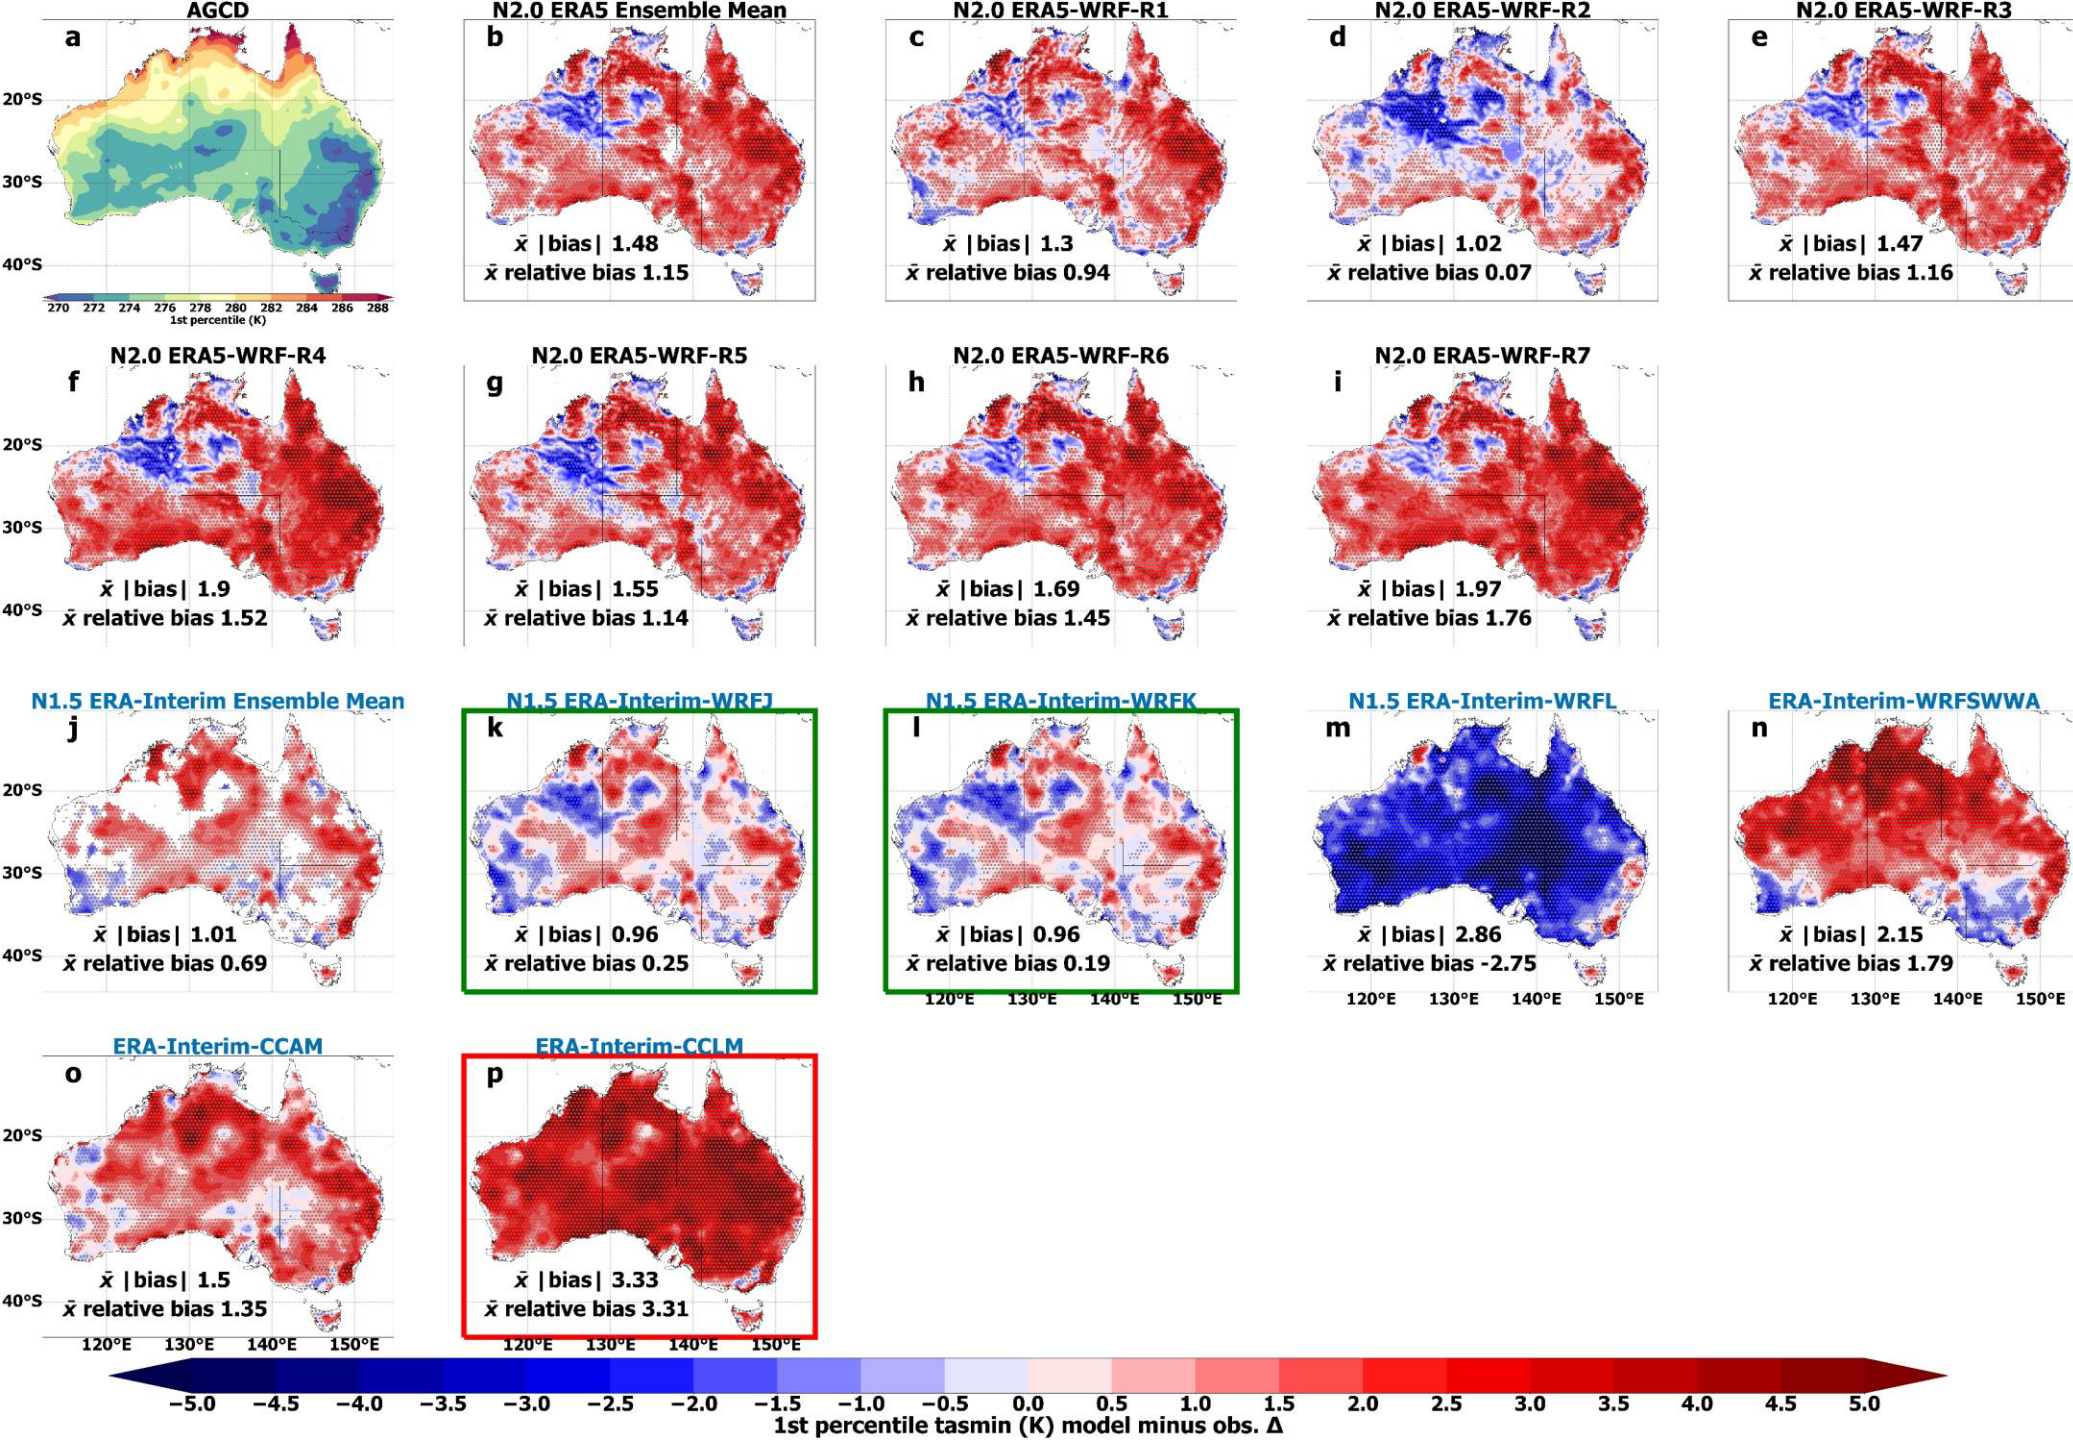

**Fig. S8** Biases in 1<sup>st</sup> percentile minimum temperatures simulated by the ERA5 and ERA-Interim forced RCMs relative to AGCD gridded observations with stippling and panel boundary colouring as per Fig. S1.

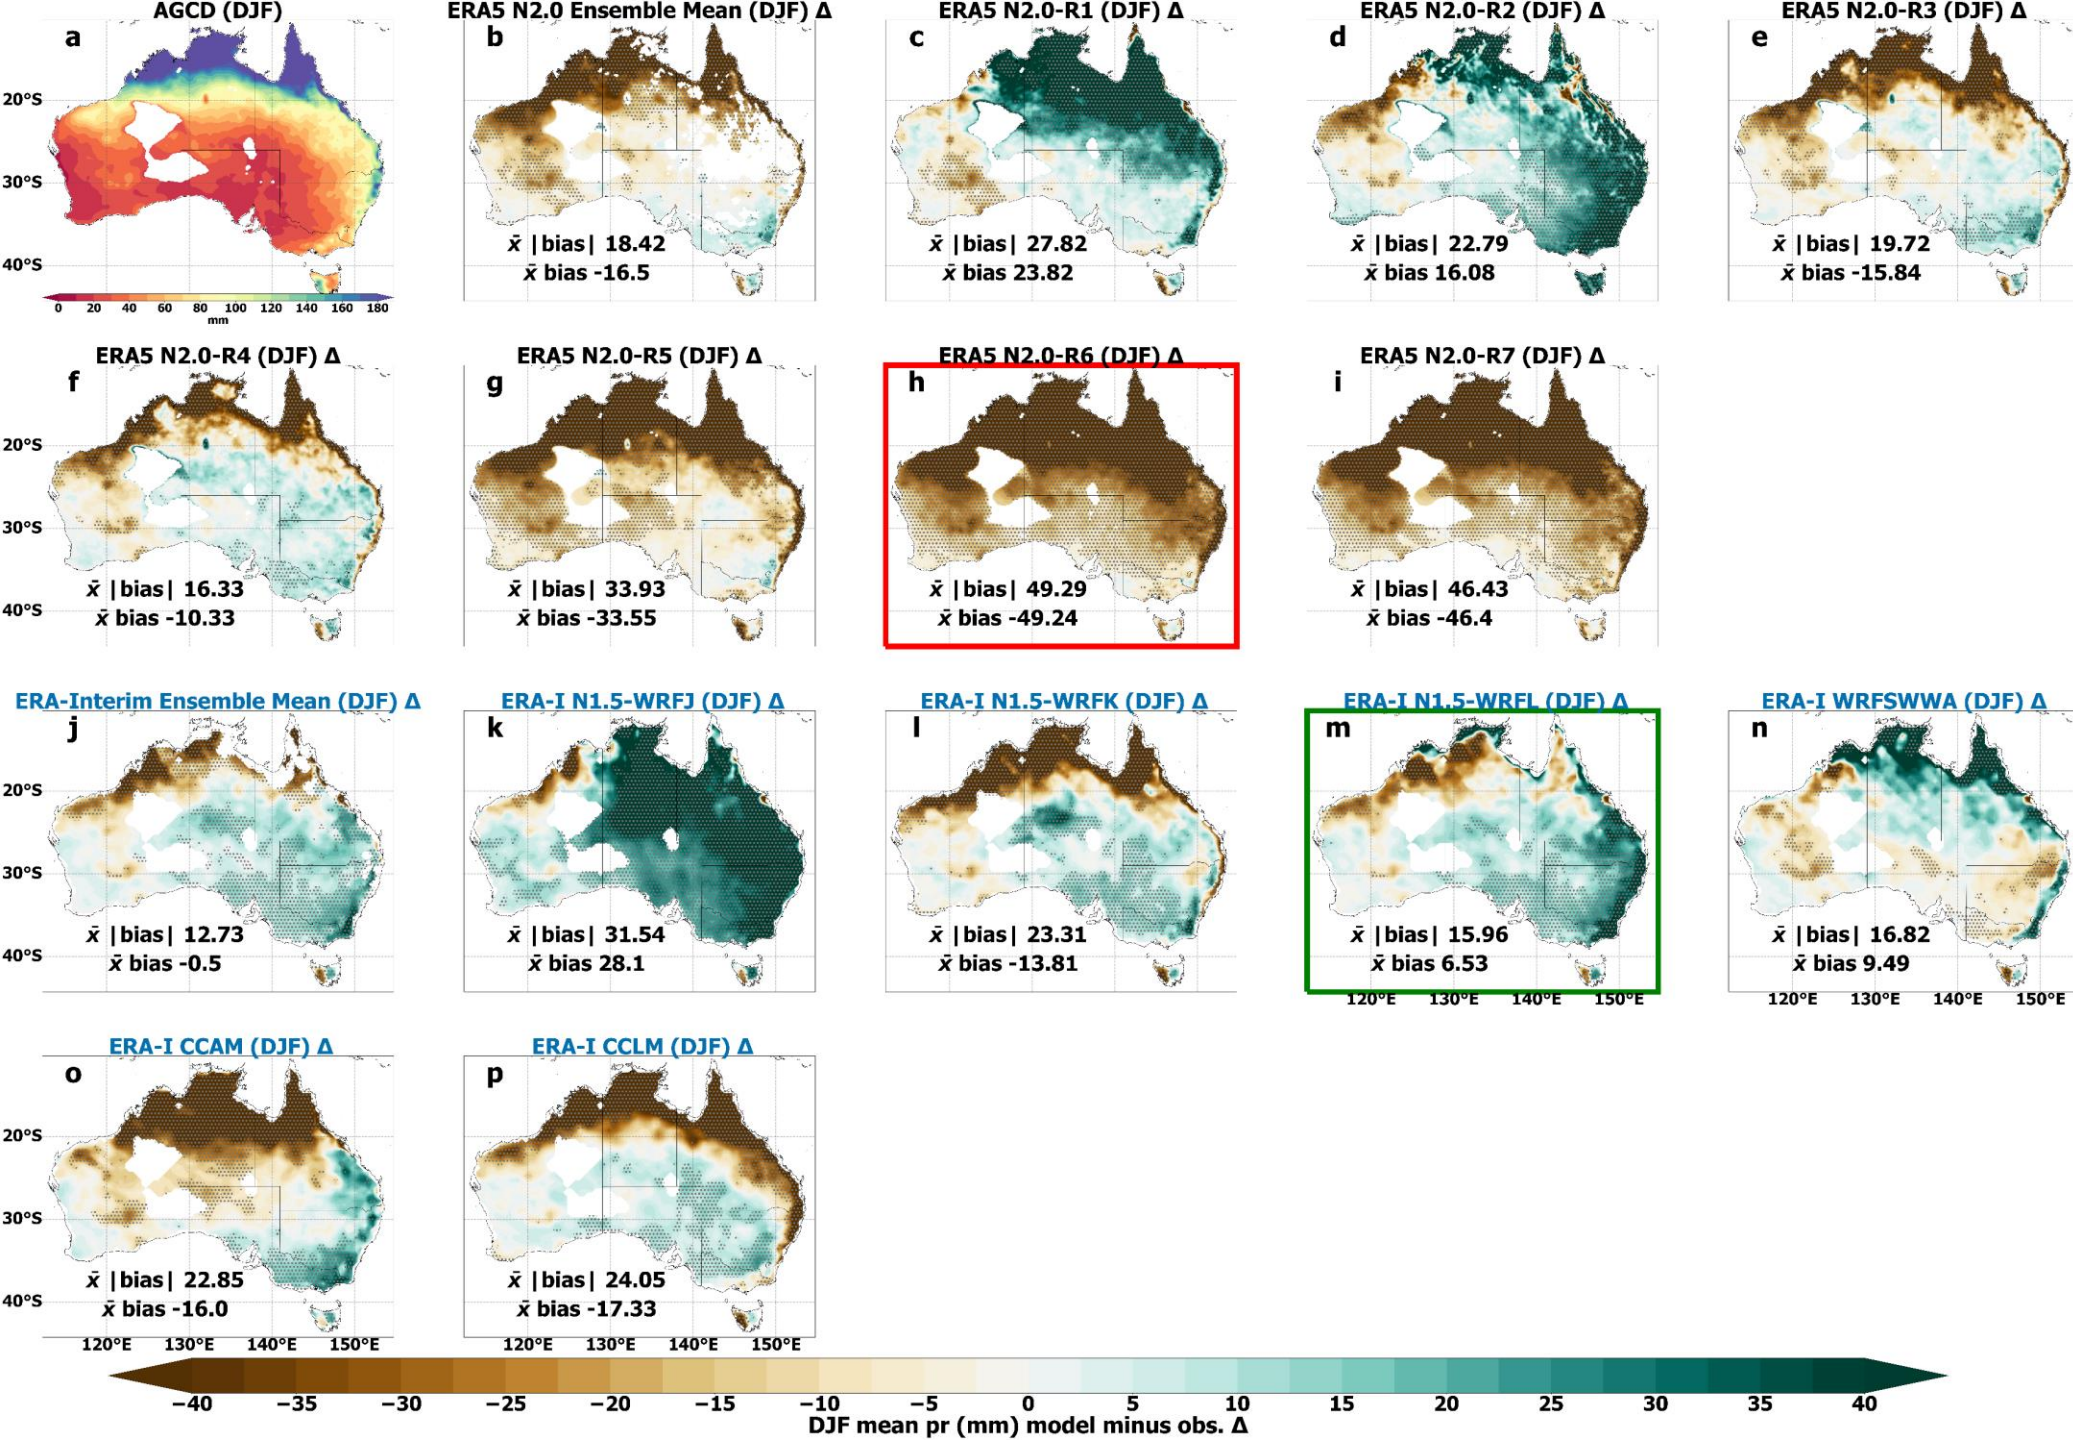

**Fig. S9** Summer (DJF) precipitation bias with respect to gridded observations with stippling and panel boundary colouring as per Fig. S1.

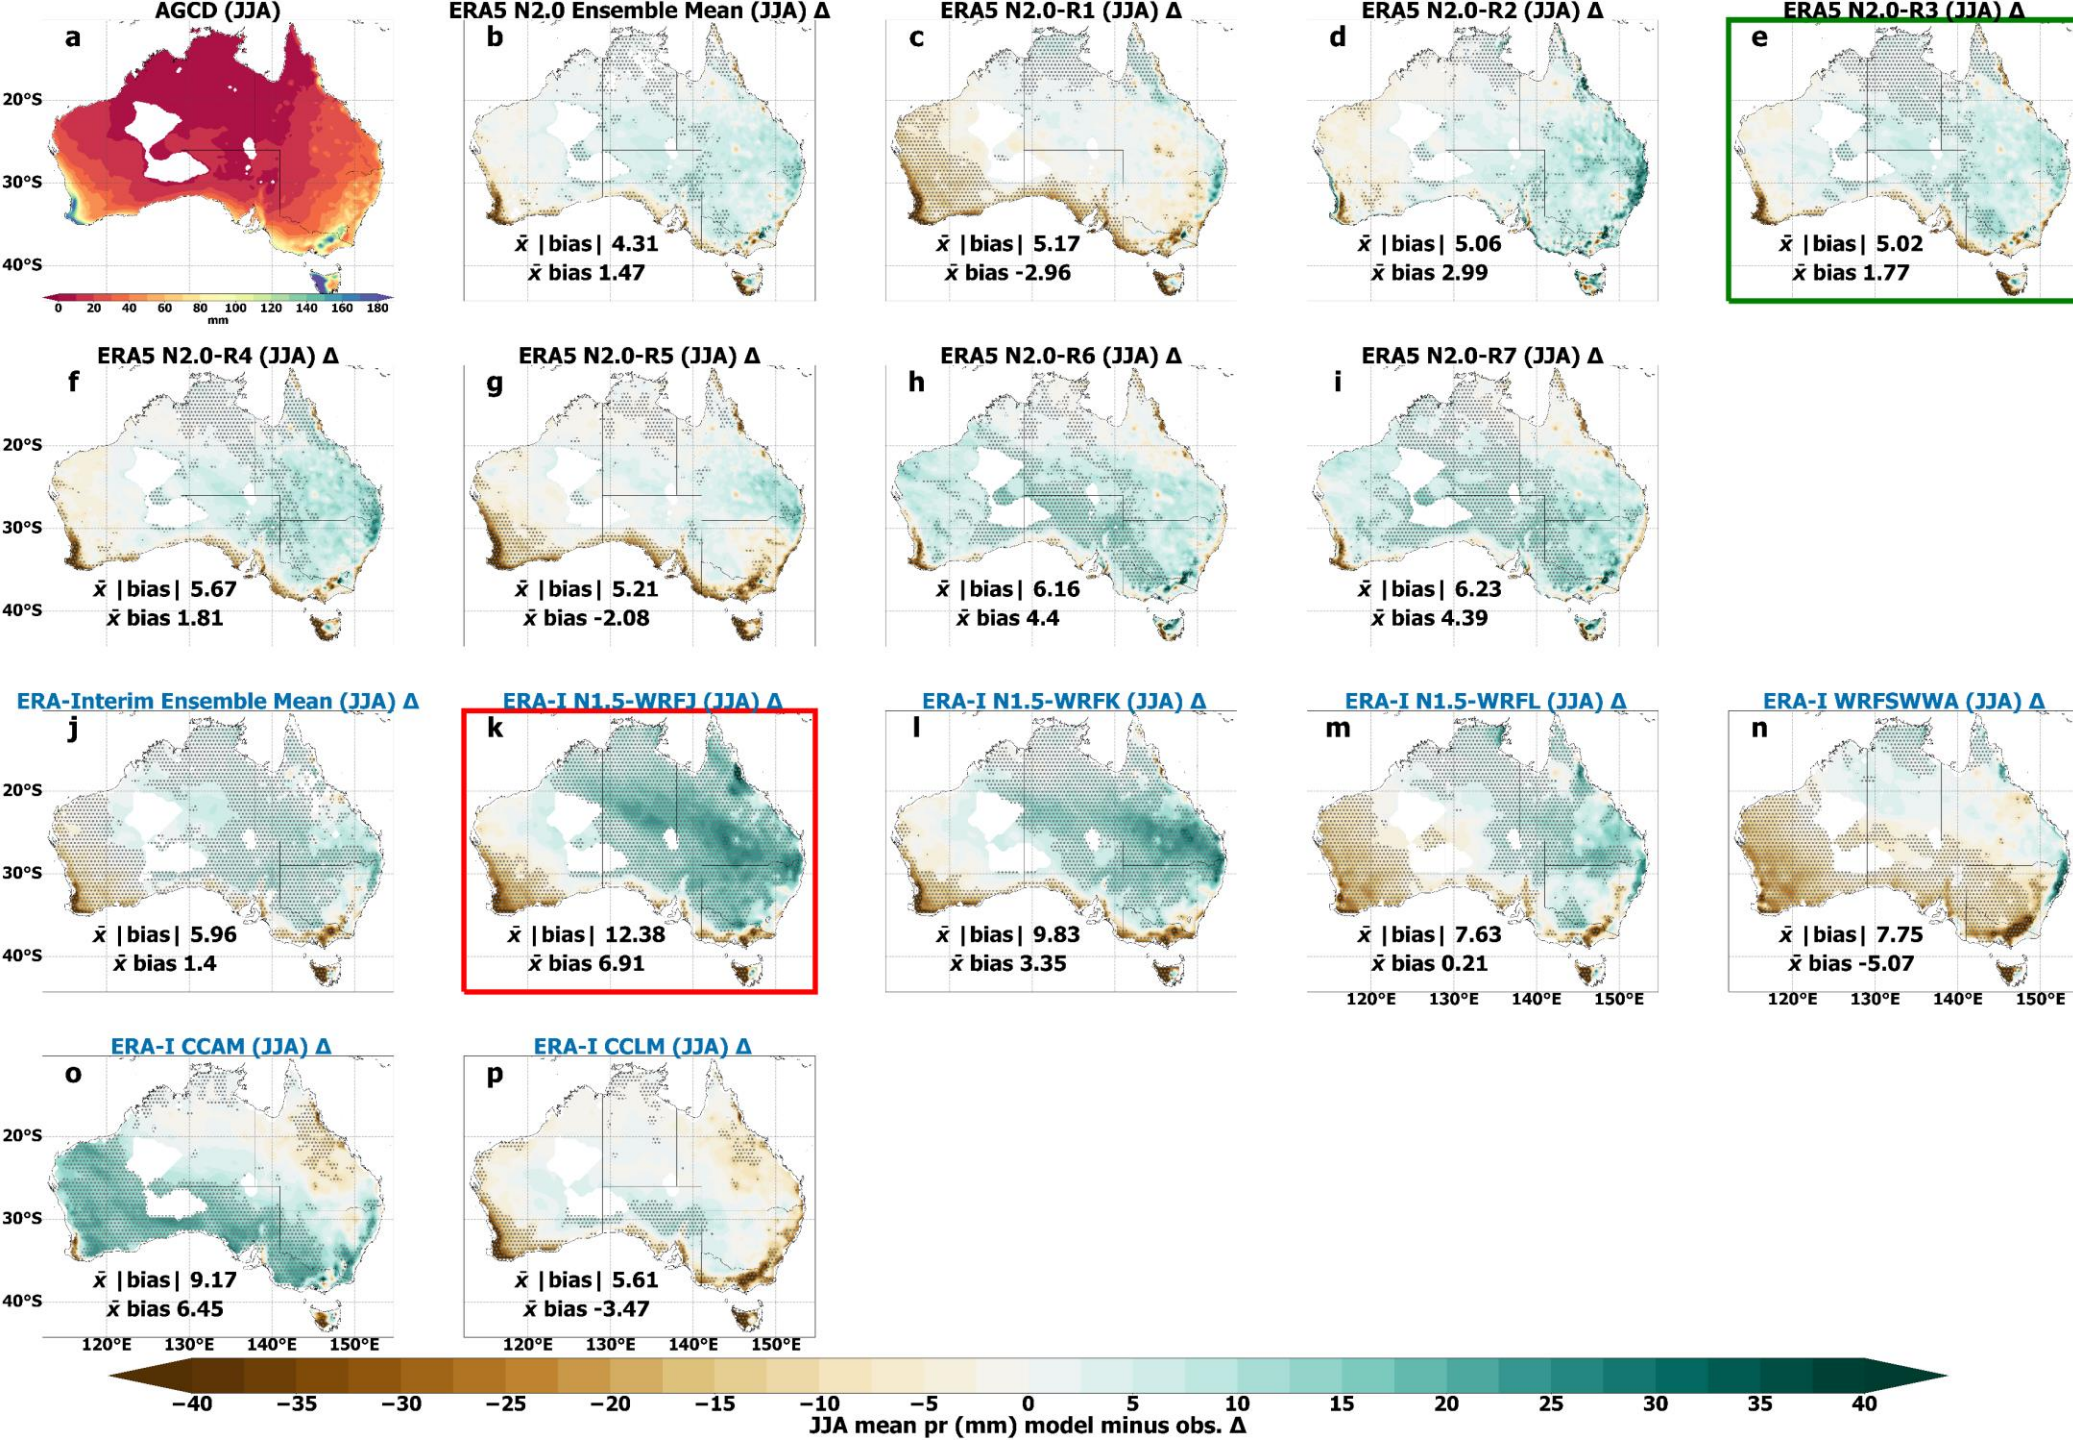

**Fig. S10** Winter (JJA) precipitation bias with respect to gridded observations with stippling and panel boundary colouring as per Fig. S1.

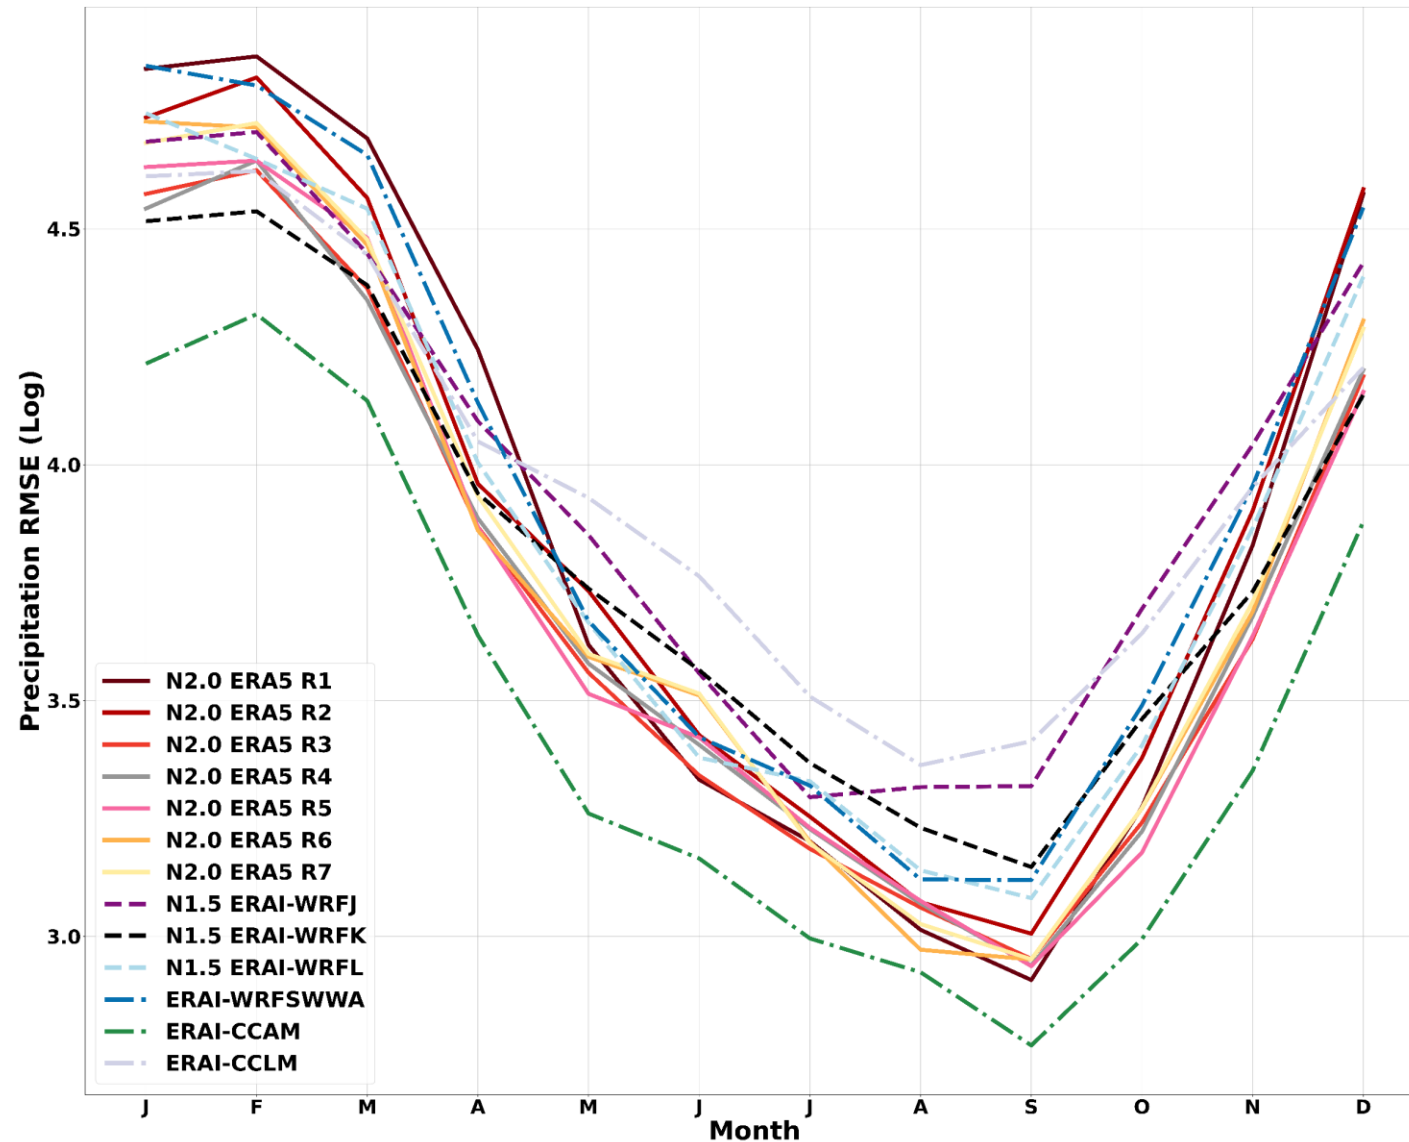

**Fig. S11** RMSE (log-transformed) annual cycle for historical precipitation as simulated over Australia by the ERA5-forced and ERA-Interim-forced RCMs.

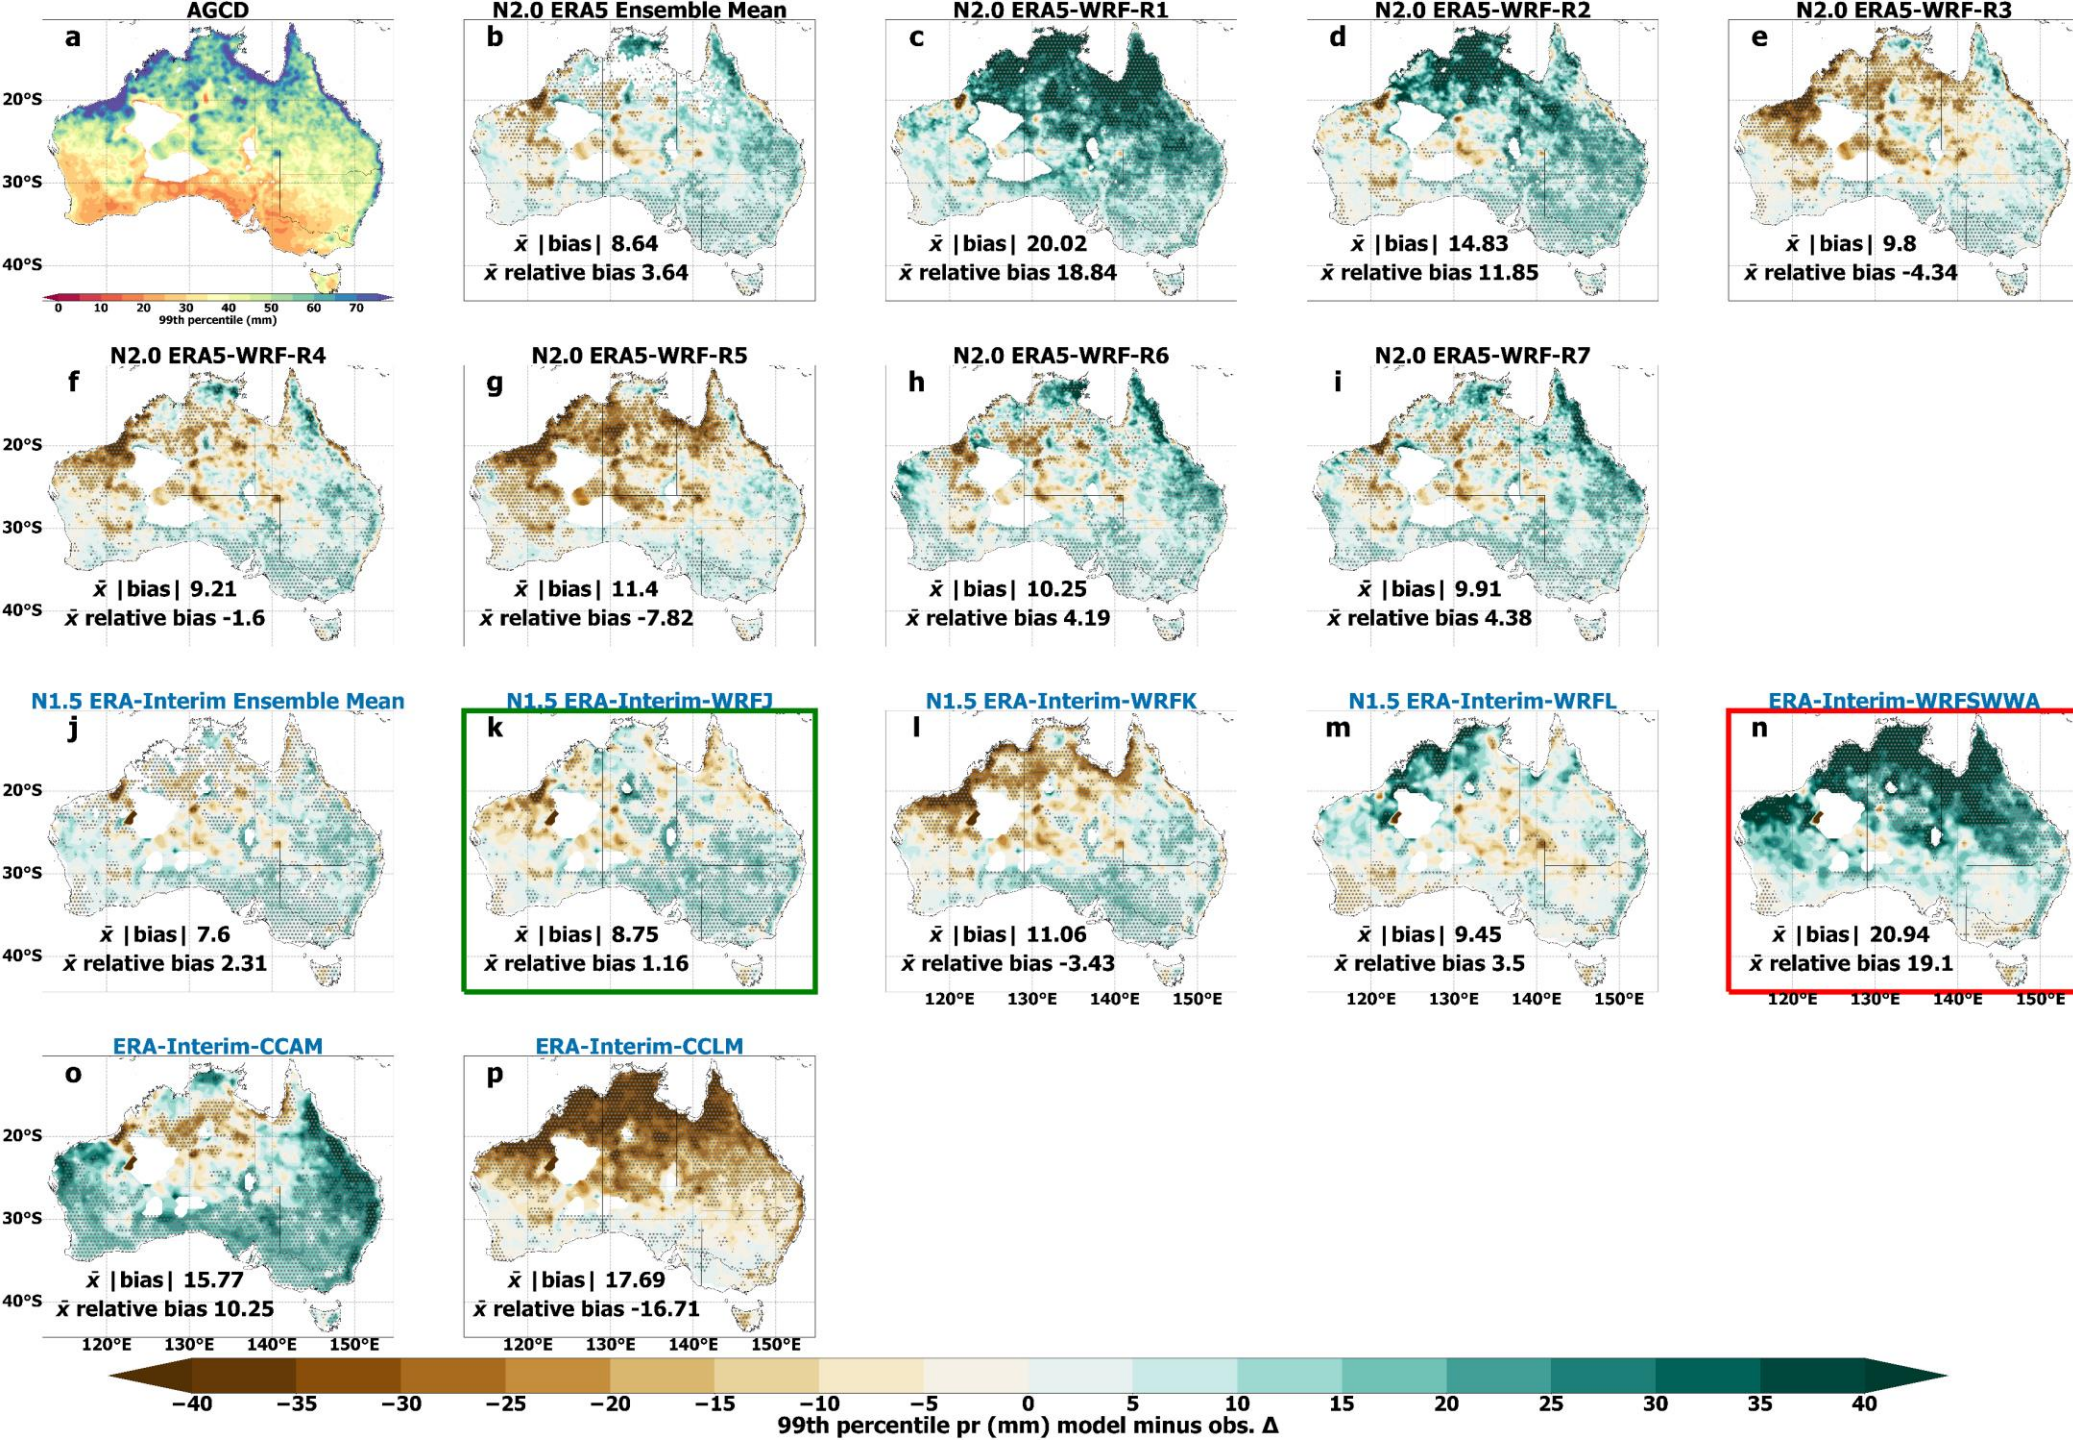

**Fig. S12** Biases in 99<sup>th</sup> percentile precipitation simulated by the ERA5 and ERA-Interim forced RCMs relative to AGCD gridded observations with stippling and panel boundary colouring as per Fig. S1.

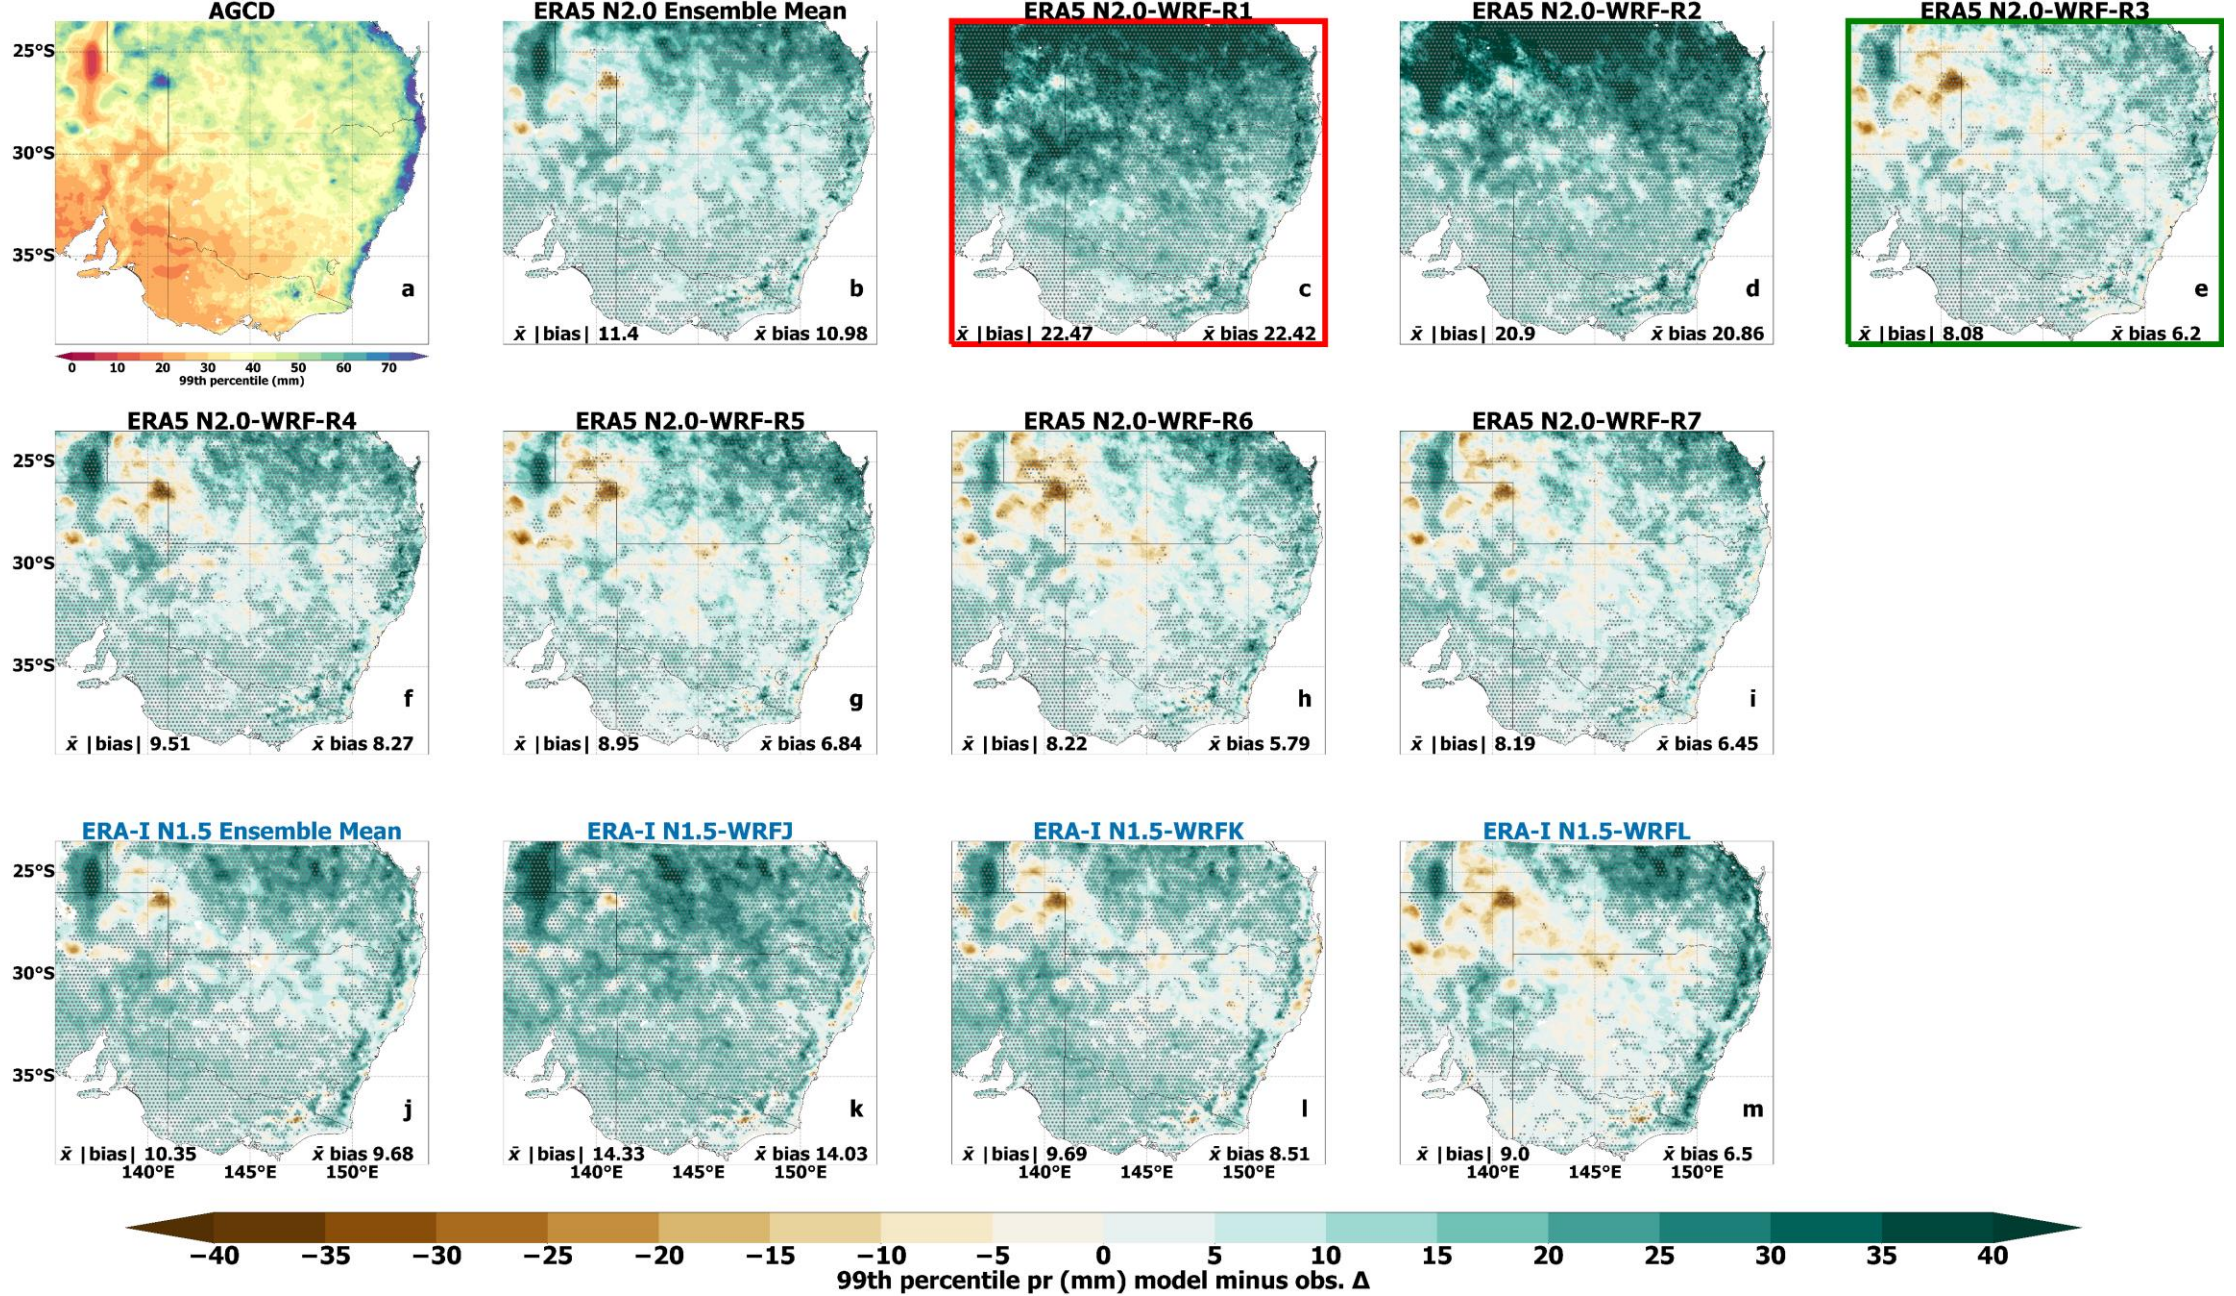

**Fig. S13** Biases in 99<sup>th</sup> percentile precipitation simulated over south-eastern Australia (WRF simulation inner domain) by the ERA5 and ERA-Interim forced RCMs relative to AGCD gridded observations with stippling and panel boundary colouring as per Fig. S1.

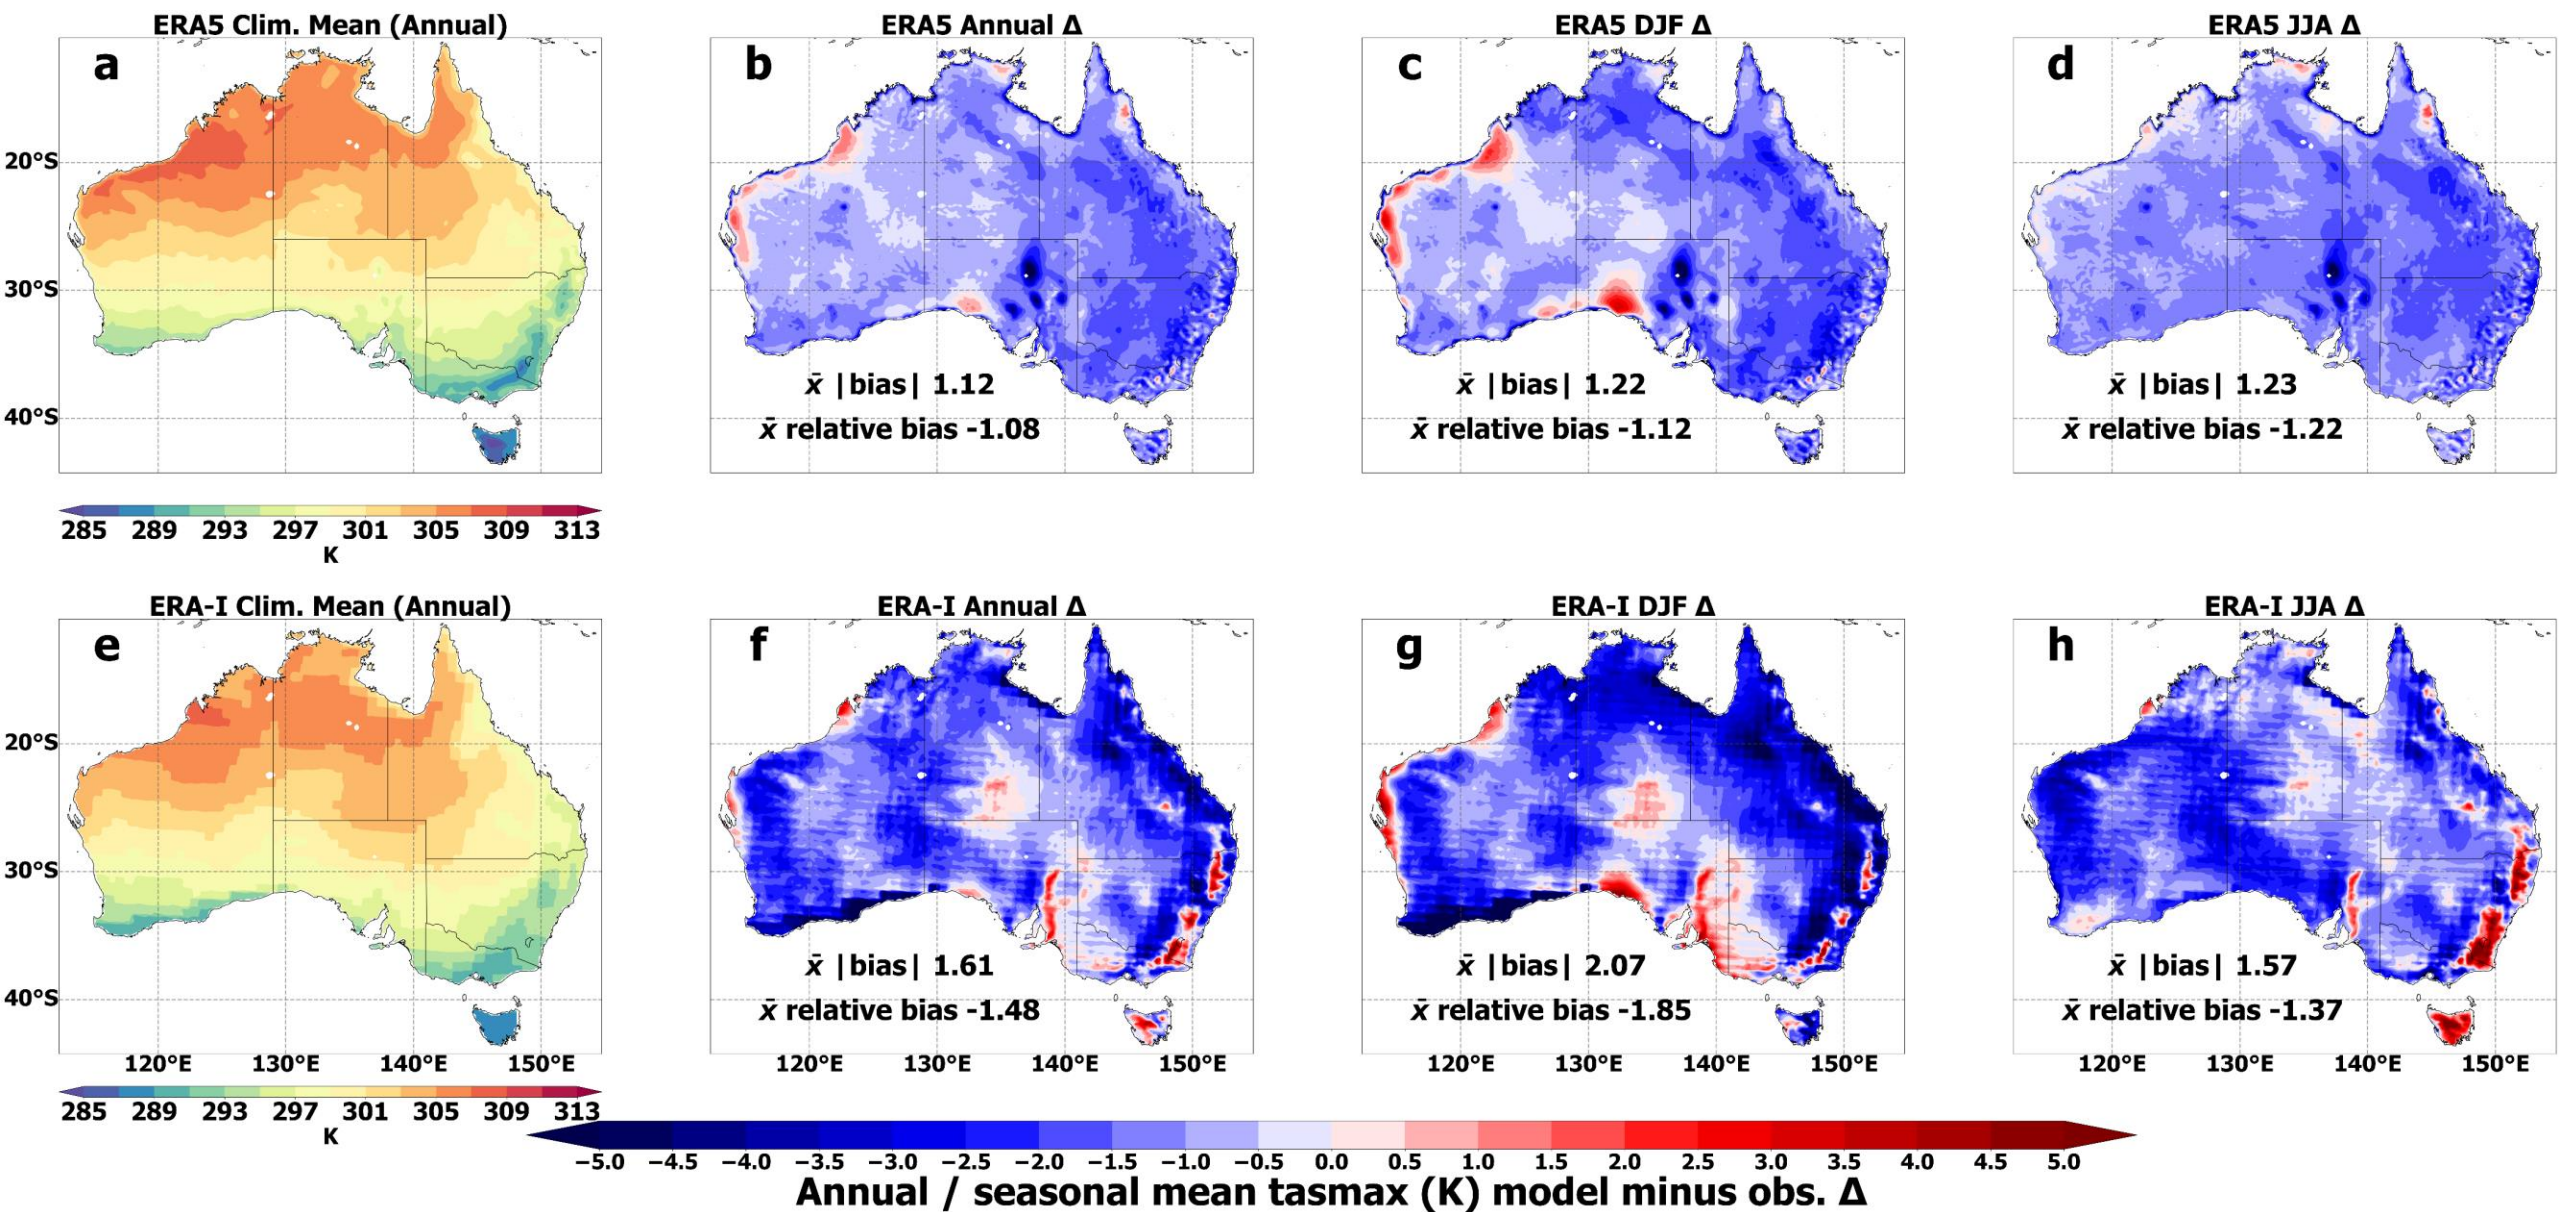

**Fig. S14** Annual, summer, and winter mean near-surface atmospheric maximum temperature bias for ERA5 and ERA-Interim reanalyses data sets with respect to Australian Gridded Climate Data (AGCD) observations (1981-2010).

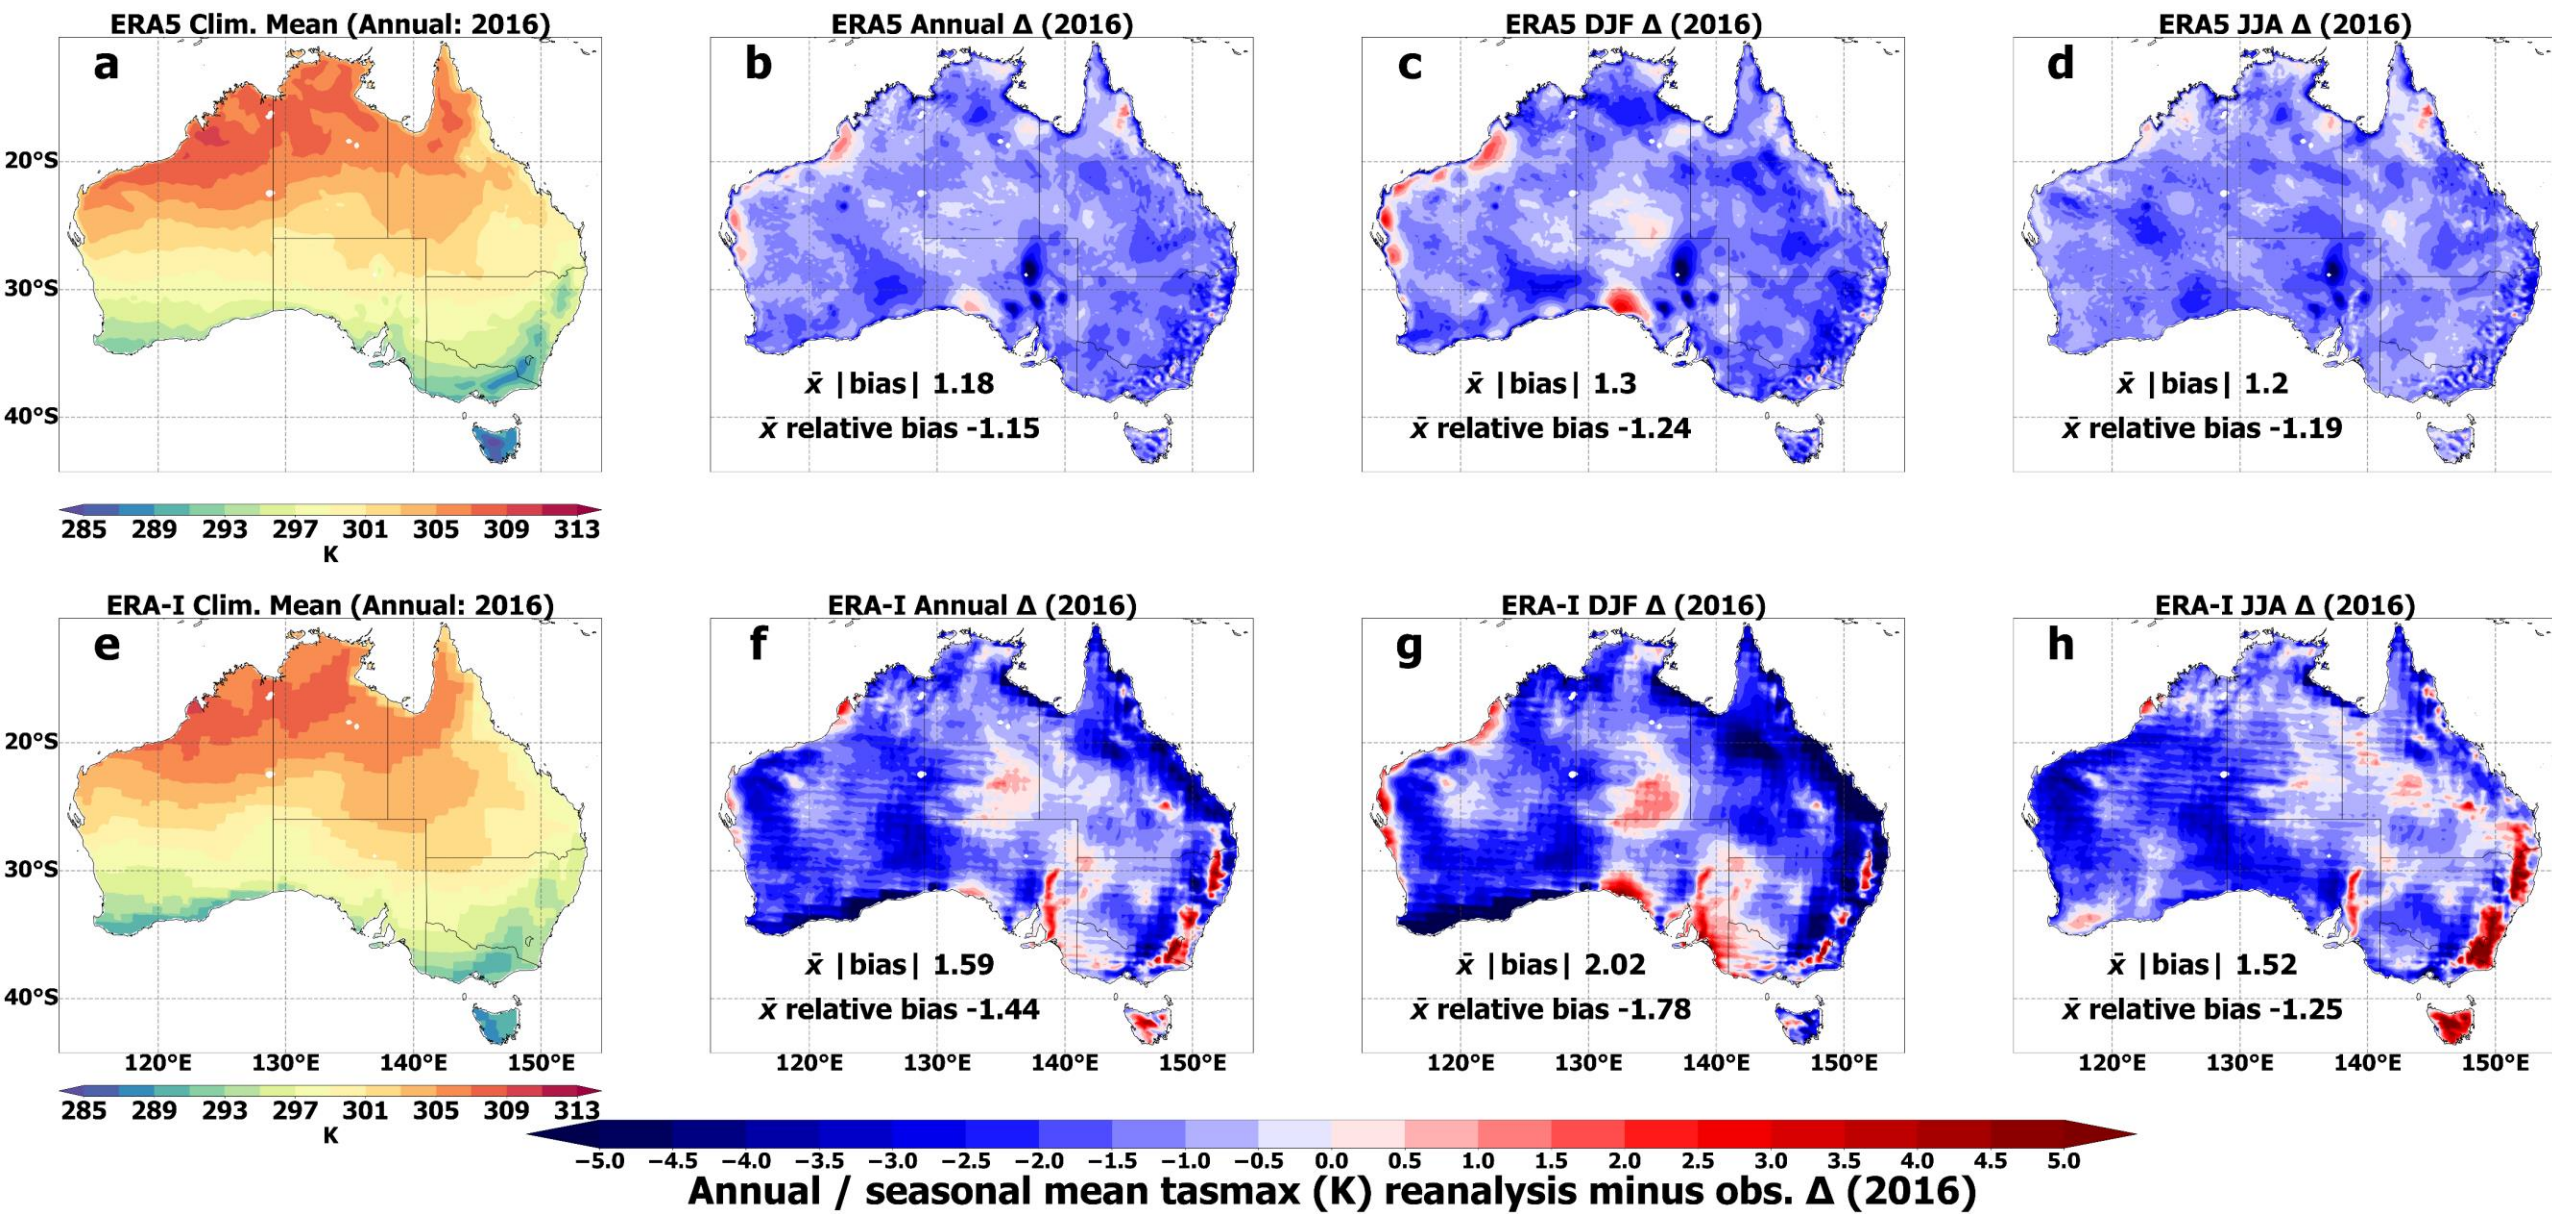

Fig. S15 As per Fig. S14 but for 2016.

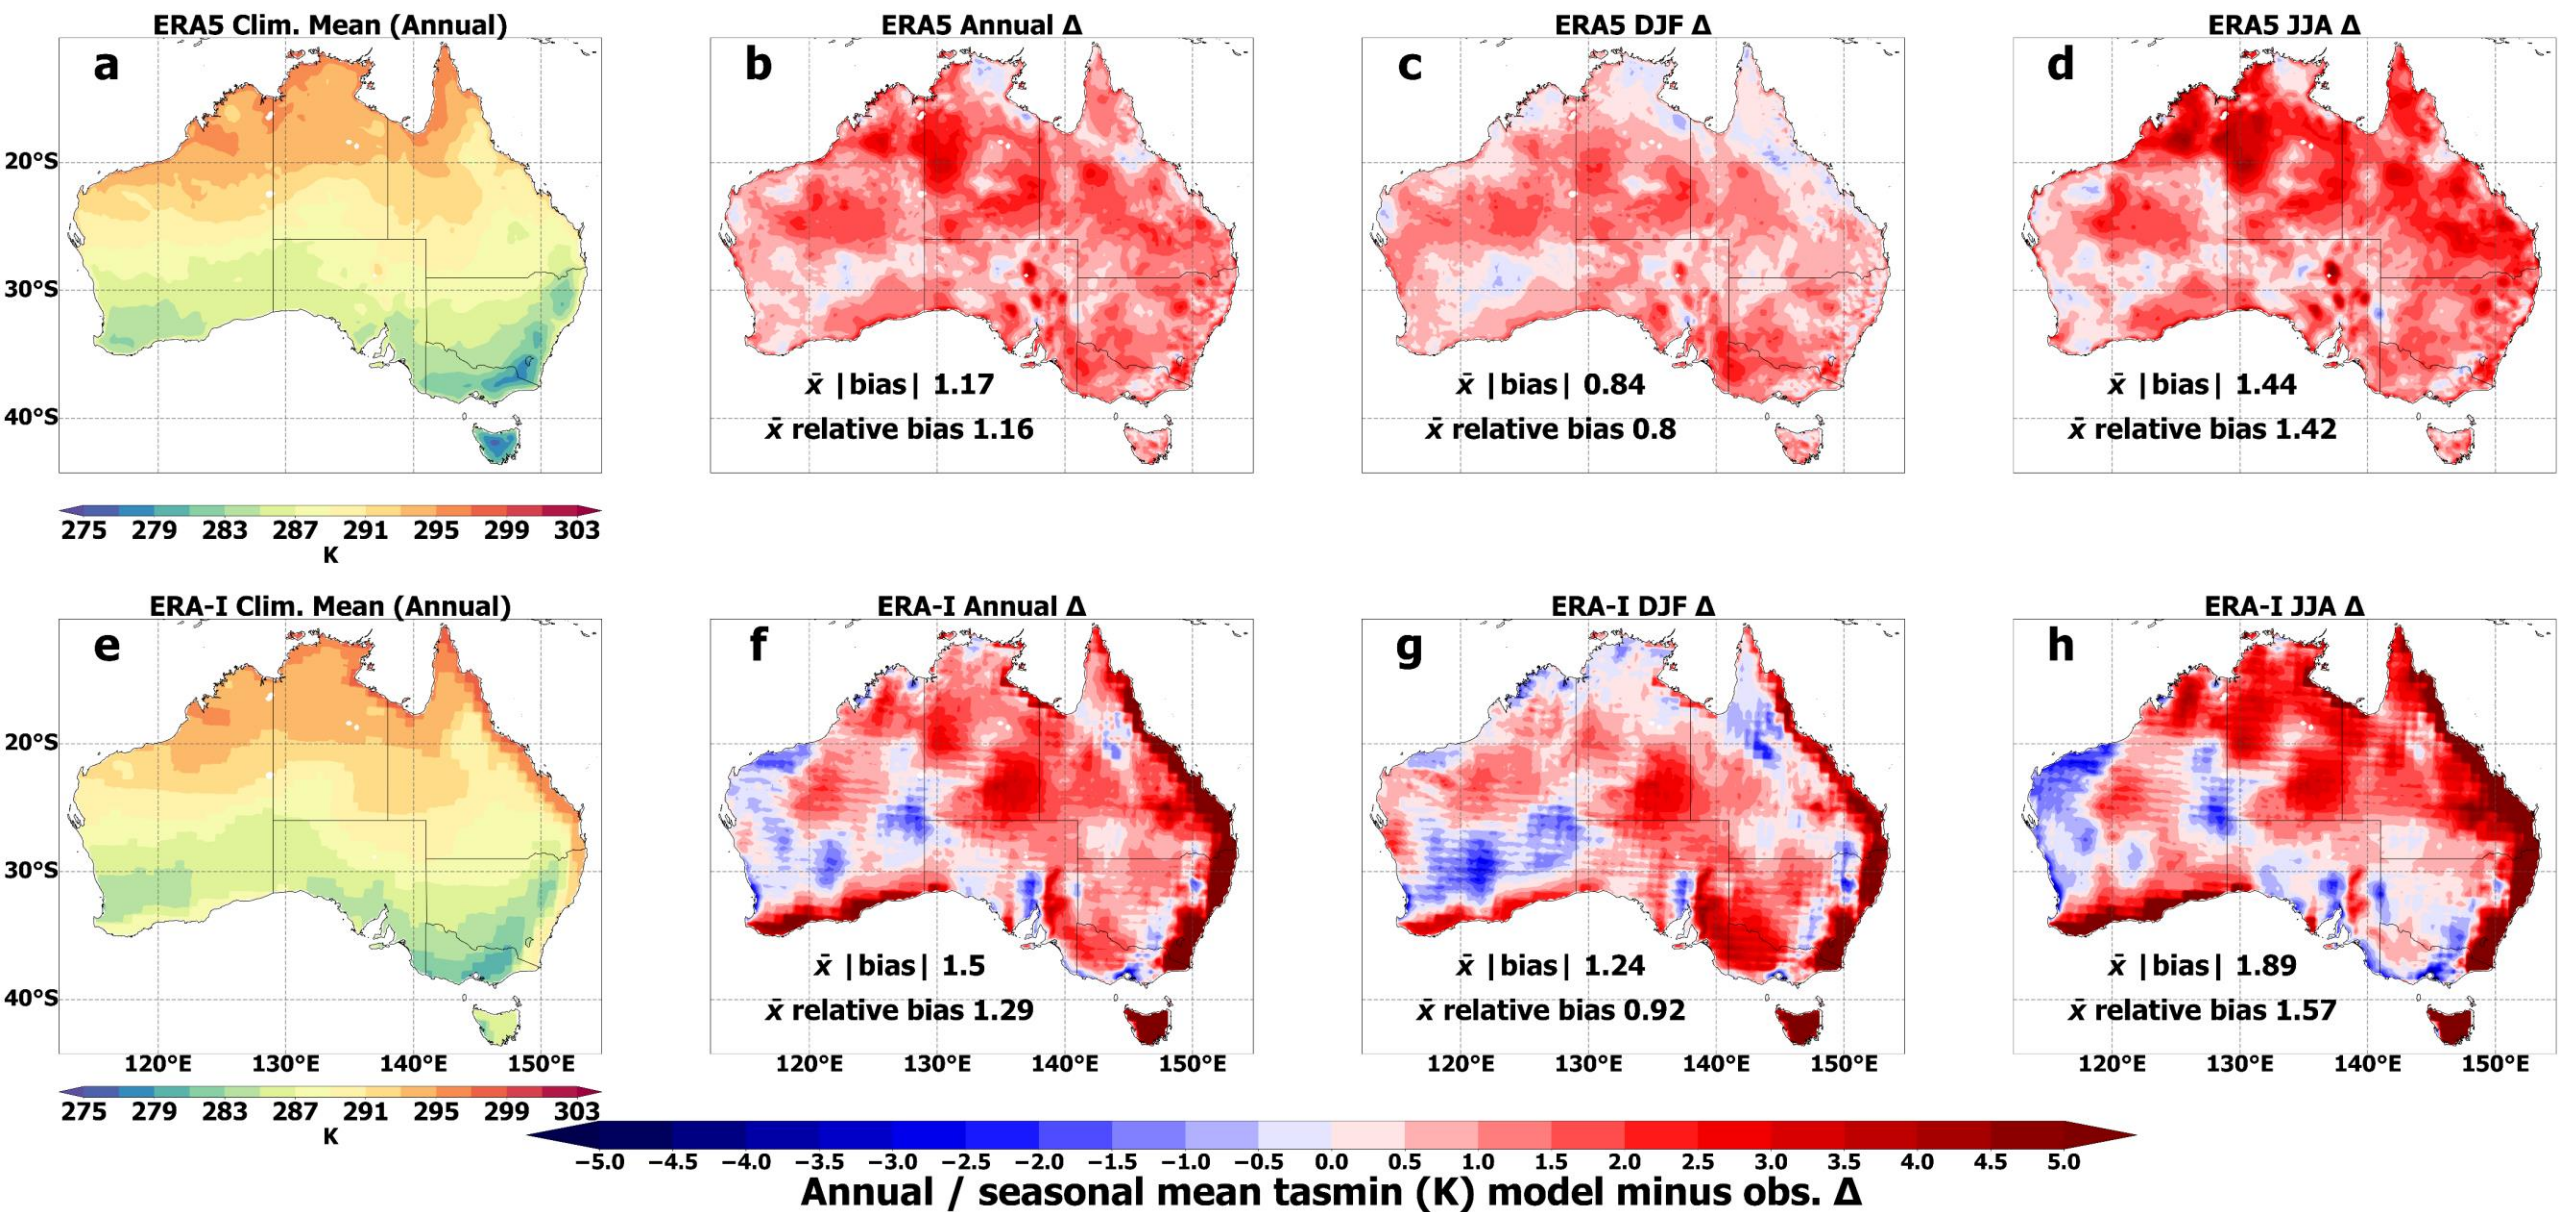

**Fig. S16** Annual, summer, and winter mean near-surface atmospheric minimum temperature bias for ERA5 and ERA-Interim reanalyses data sets with respect to Australian Gridded Climate Data (AGCD) observations (1981-2010).

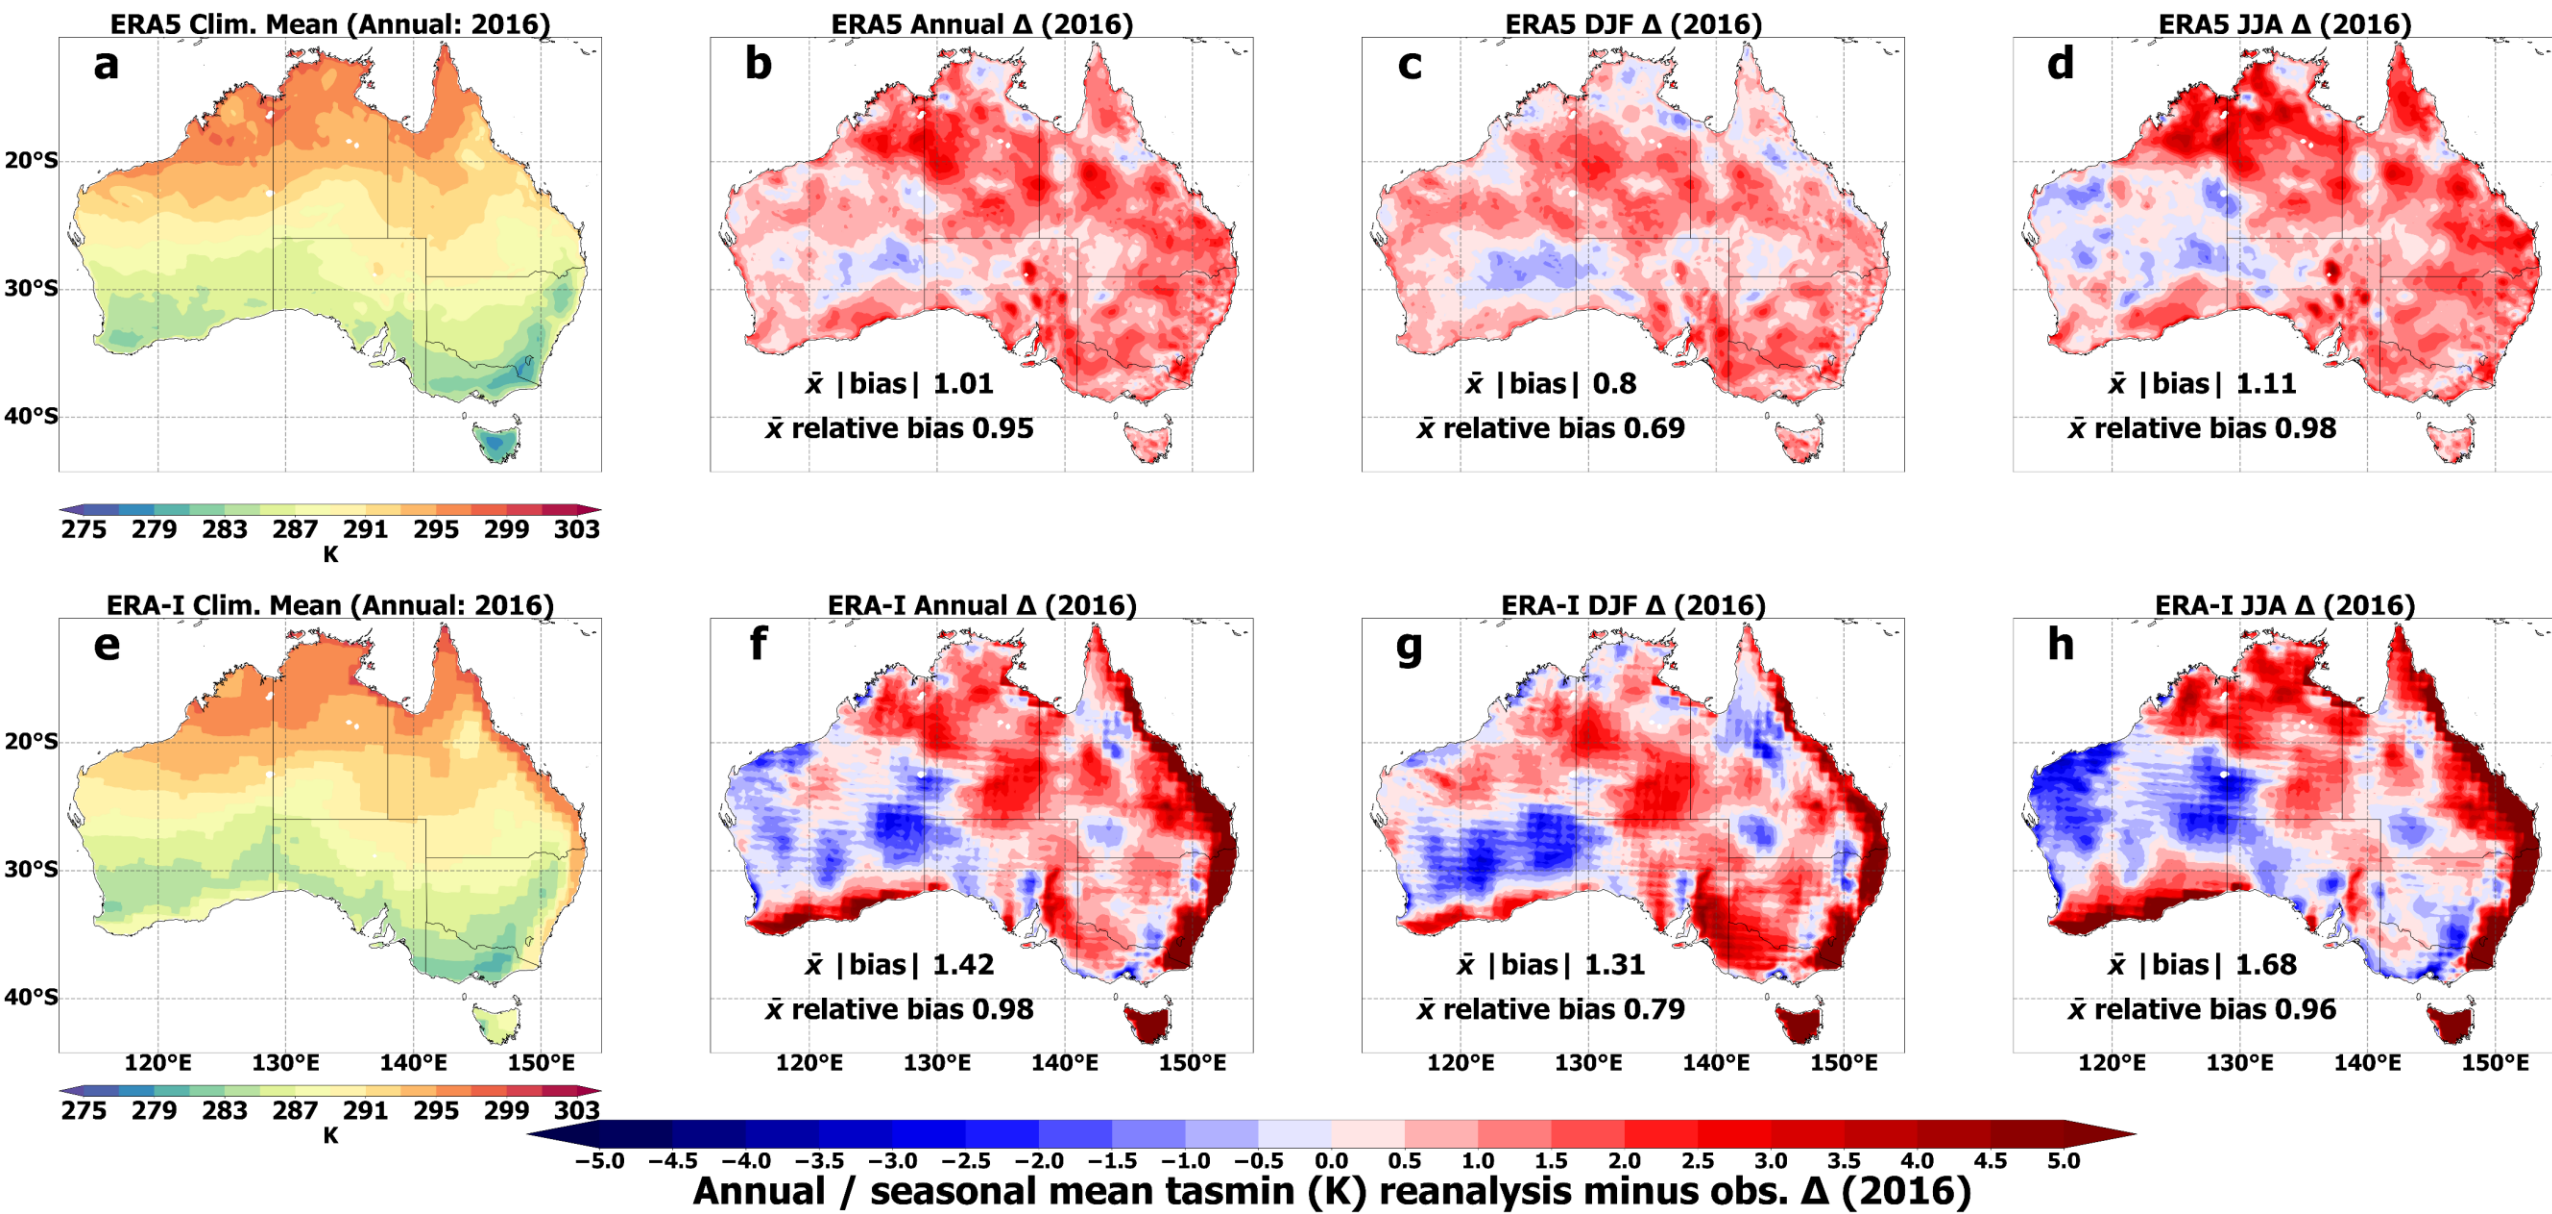

**Fig. S17** As per Fig. S16 but for 2016.

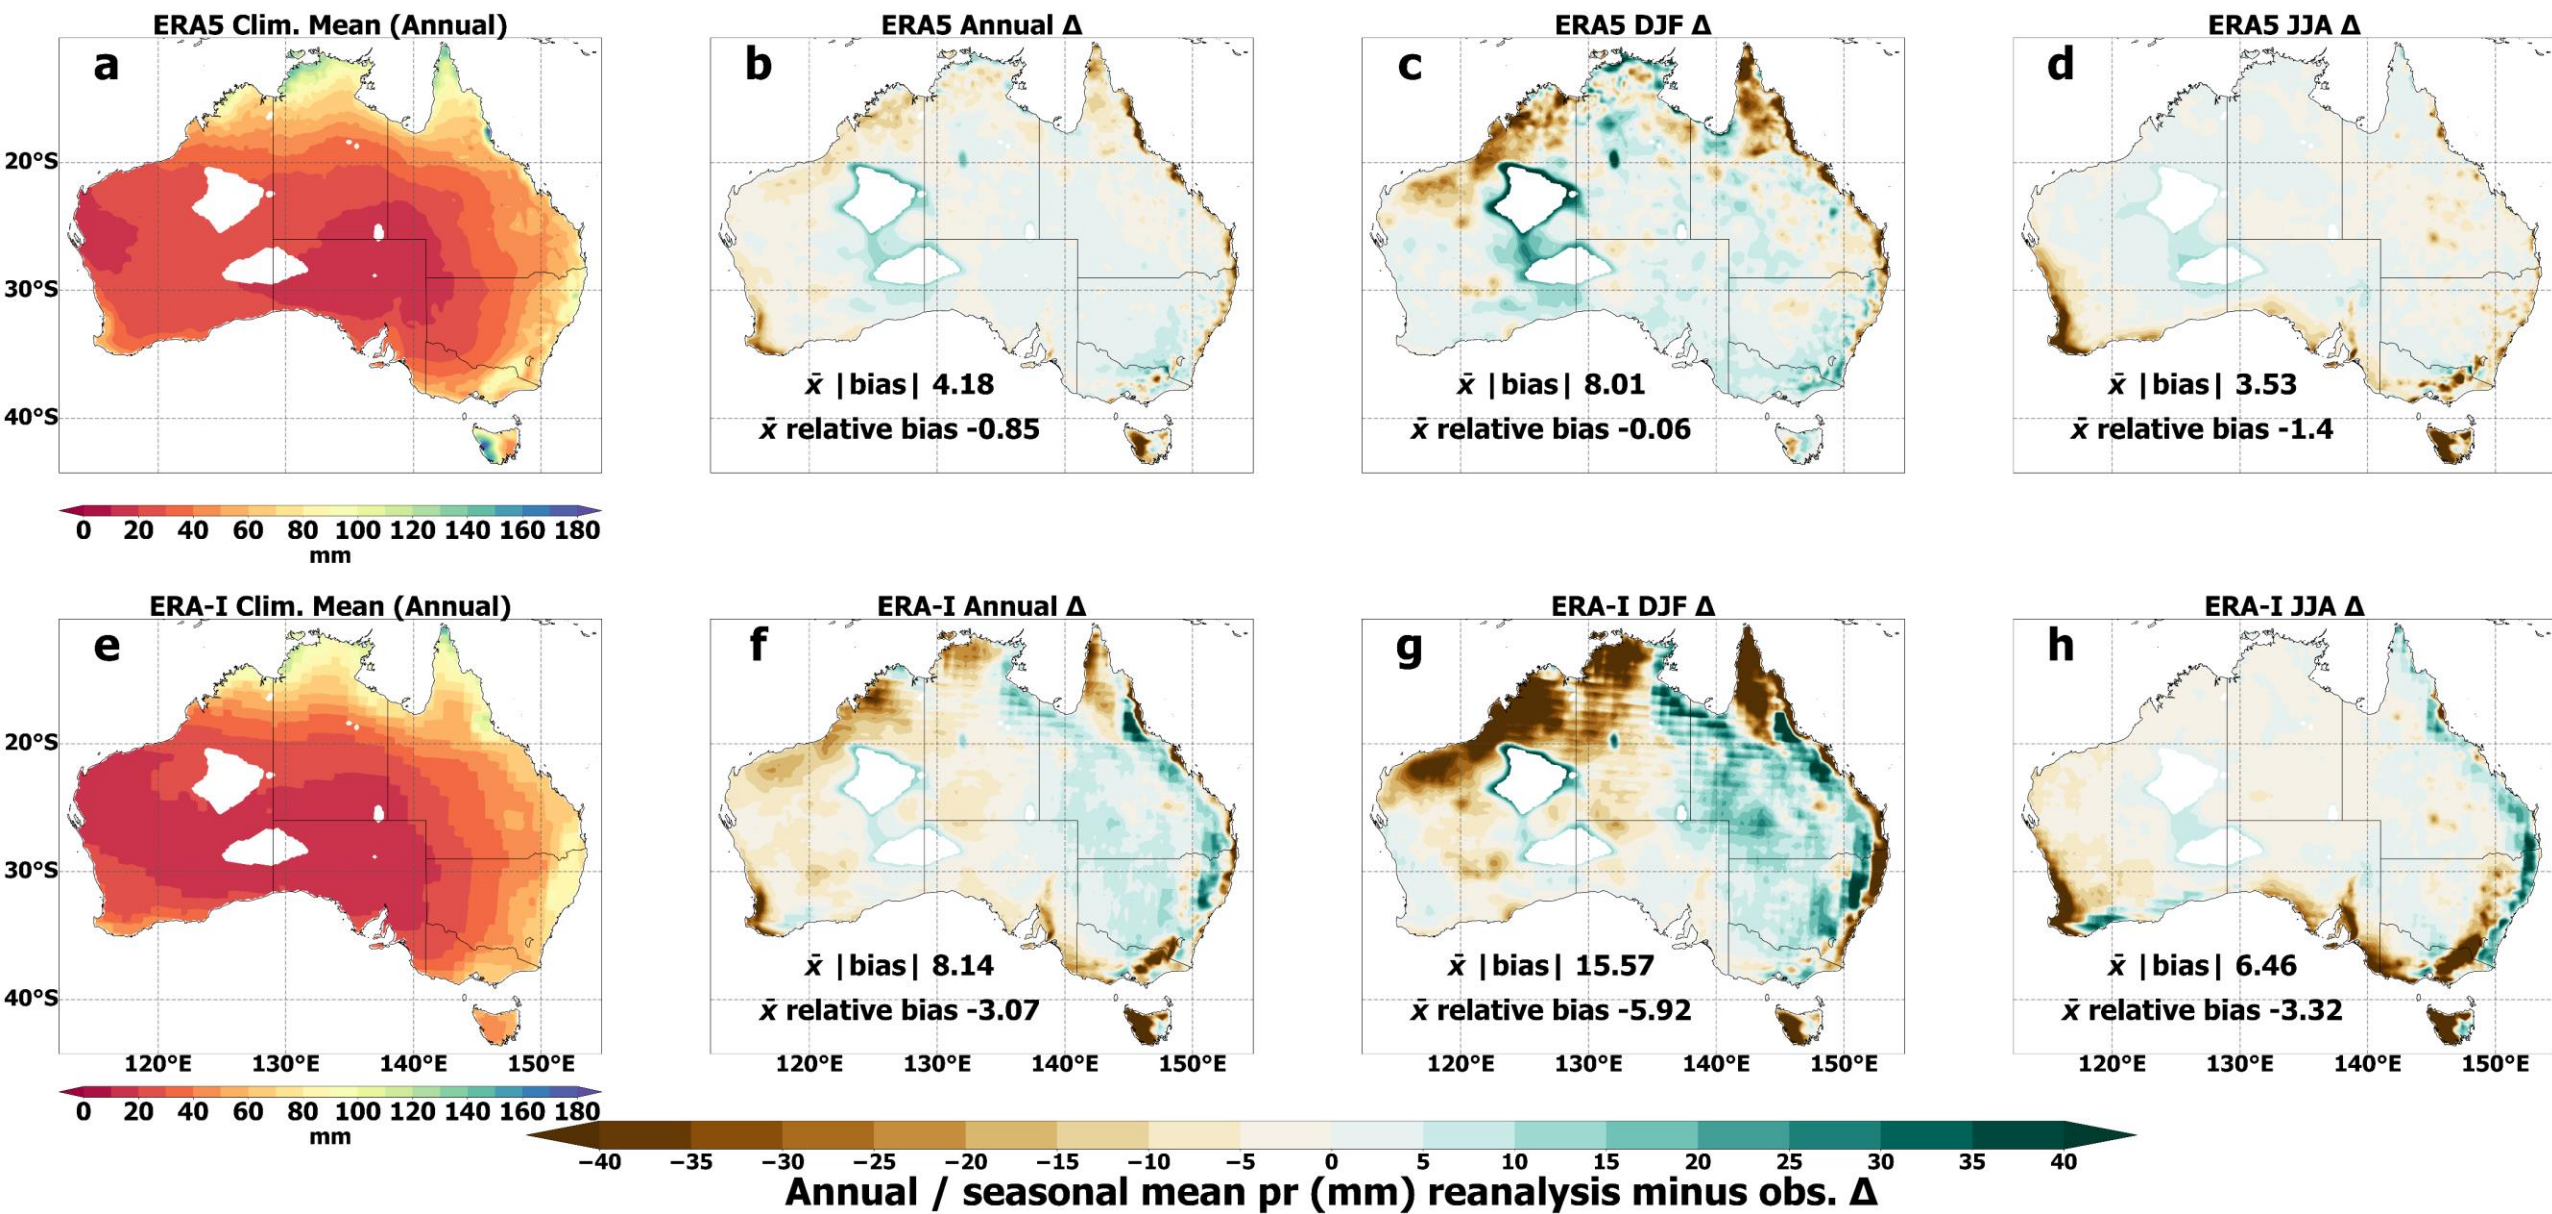

**Fig. S18** Annual, summer, and winter mean precipitation bias for ERA5 and ERA-Interim reanalyses data sets with respect to Australian Gridded Climate Data (AGCD) observations (1981-2010).

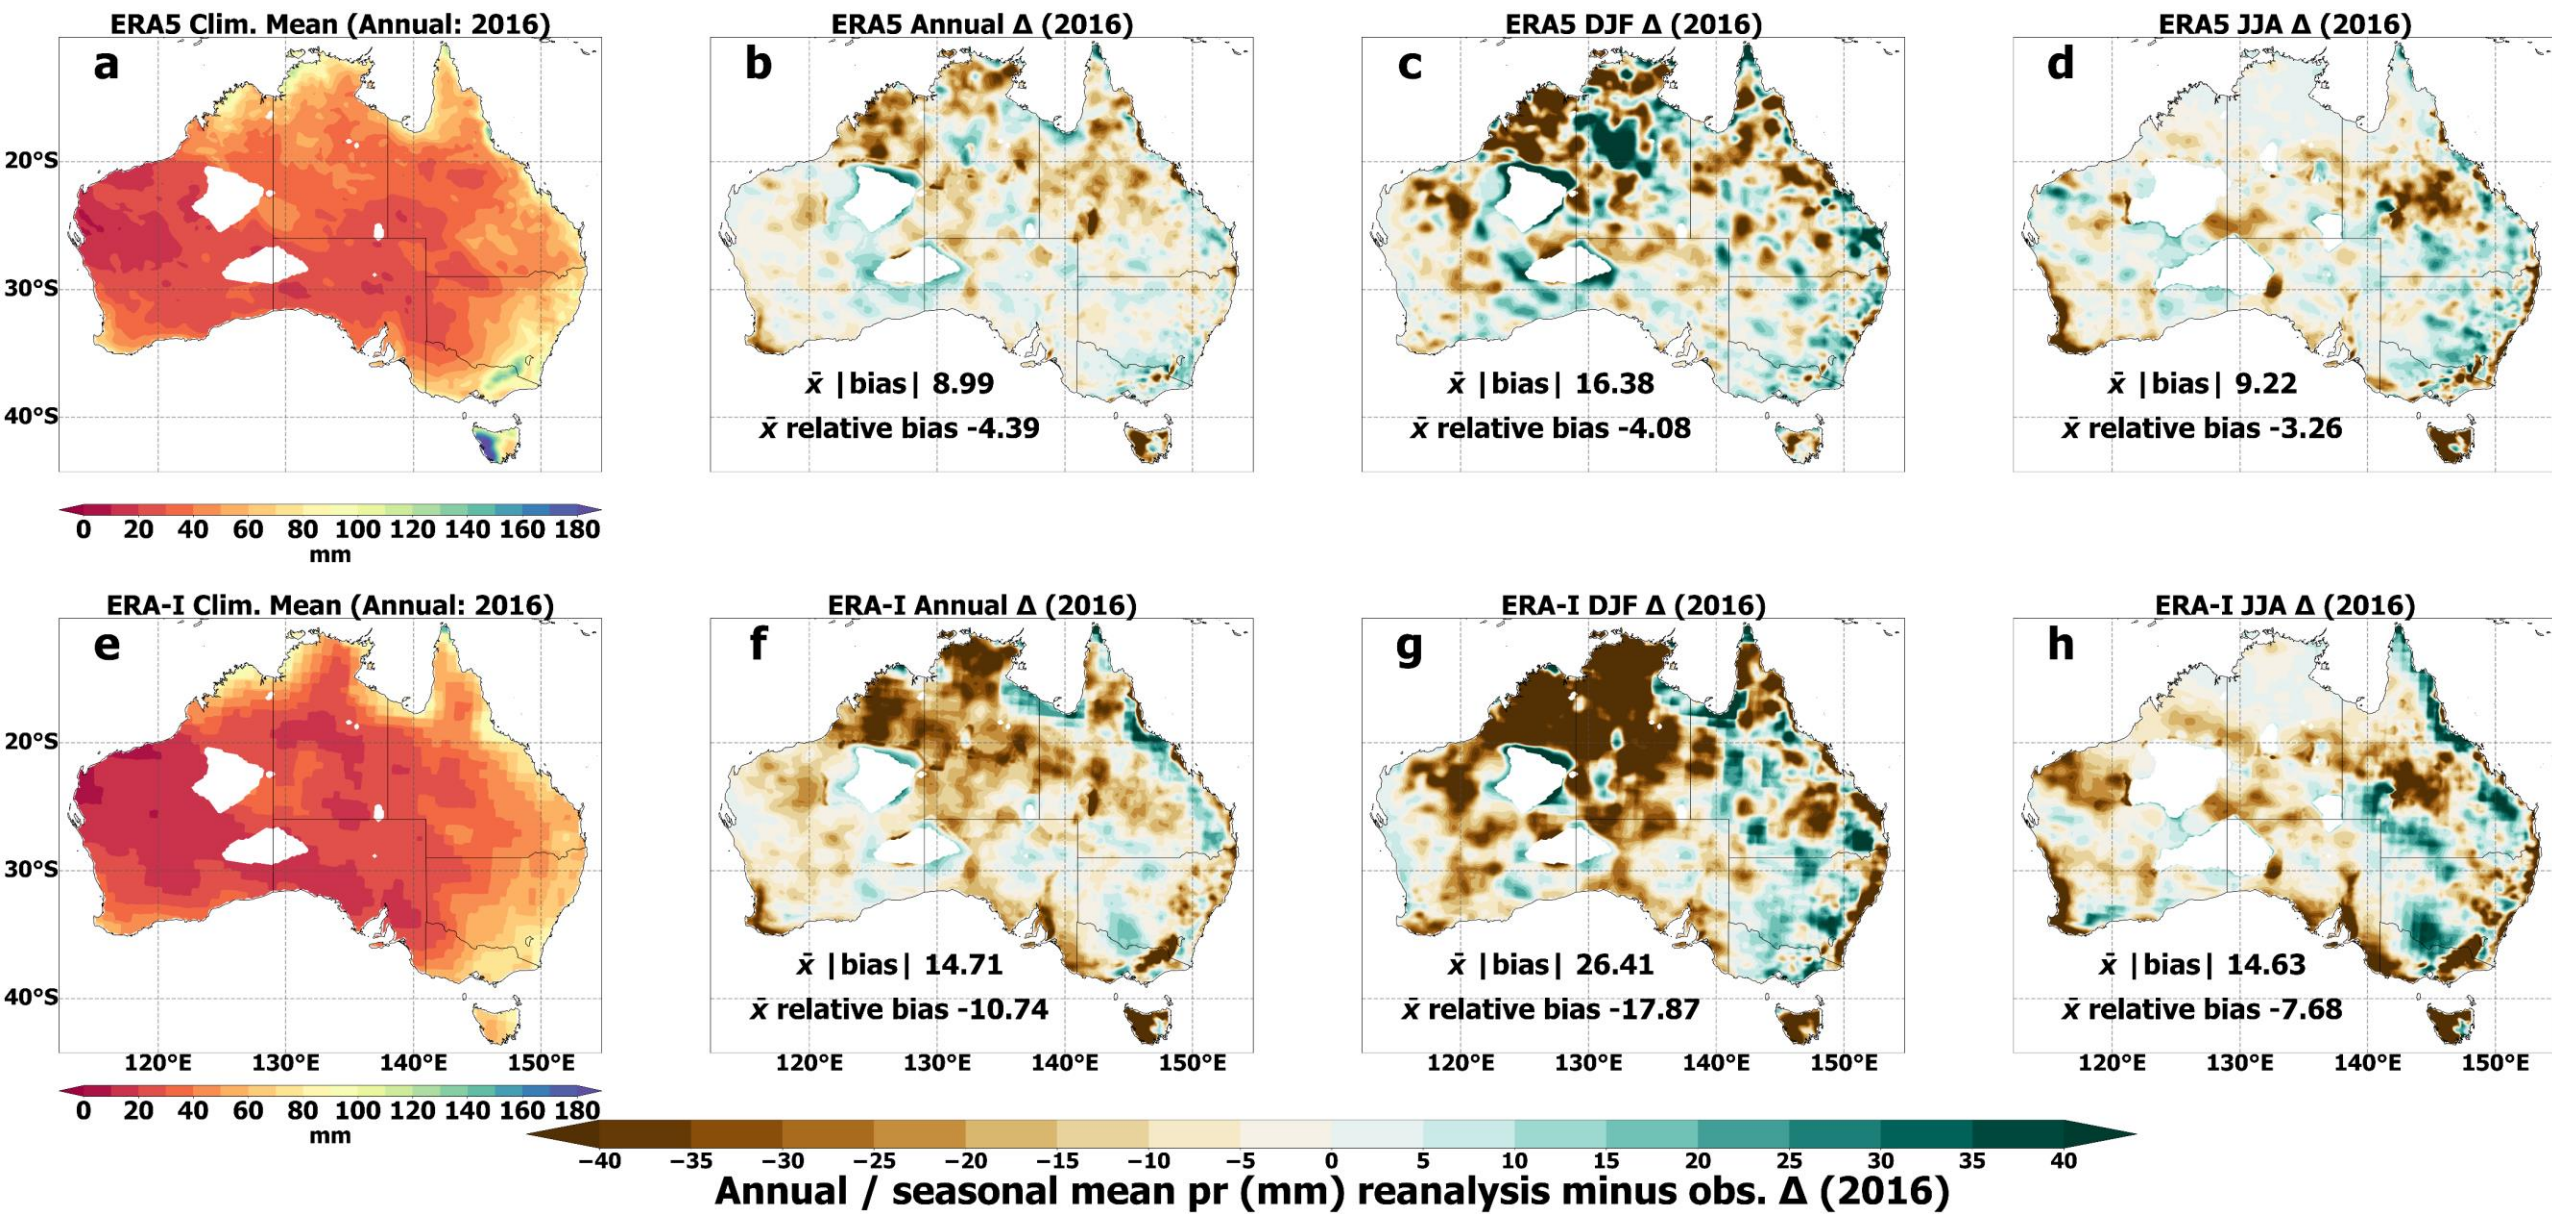

Fig. S19 As per Fig. S18 but for 2016.

**Fig. S20** Namelist settings for the CORDEX-CMIP6 NARClIM2.0 ERA5-forced RCMs R1-R7: left panel shows physics settings for each RCM; right panel shows settings universal to each of R1-R7.

|              | Domain               | CORDEX Australasia 20 km outer domain |        |        |        |        |        |        | Southeast Australia Convection-permitting 4 km |        |        |        |        |        |        |
|--------------|----------------------|---------------------------------------|--------|--------|--------|--------|--------|--------|------------------------------------------------|--------|--------|--------|--------|--------|--------|
|              | RCM                  | R1                                    | R2     | R3     | R4     | R5     | R6     | R7     | R1                                             | R2     | R3     | R4     | R5     | R6     | R7     |
| physics      | mp_physics           | 6                                     | 6      | 8      | 8      | 8      | 8      | 8      | 6                                              | 6      | 8      | 8      | 8      | 8      | 8      |
|              | ra_sw_physics        | 5                                     | 4      | 4      | 4      | 4      | 4      | 4      | 5                                              | 4      | 4      | 4      | 4      | 4      | 4      |
|              | ra_lw_physics        | 5                                     | 4      | 4      | 4      | 4      | 4      | 4      | 5                                              | 4      | 4      | 4      | 4      | 4      | 4      |
|              | sf_sfclay_physics    | 1                                     | 1      | 1      | 1      | 1      | 1      | 1      | 1                                              | 1      | 1      | 1      | 1      | 1      | 1      |
|              | sf_surface_physics   | 2                                     | 4      | 4      | 4      | 4      | 4      | 4      | 2                                              | 4      | 4      | 4      | 4      | 4      | 4      |
|              | bl_pbl_physics       | 1                                     | 5      | 5      | 5      | 7      | 7      | 7      | 1                                              | 5      | 5      | 5      | 7      | 7      | 7      |
|              | cu_physics           | 2                                     | 1      | 2      | 2      | 2      | 6      | 6      | 0                                              | 0      | 0      | 0      | 0      | 0      | 0      |
|              | sf_urban_physics     | 1                                     | 1      | 1      | 1      | 1      | 1      | 1      | 1                                              | 1      | 1      | 1      | 1      | 1      | 1      |
|              | radt                 | 10                                    | 10     | 10     | 10     | 10     | 10     | 10     | 10                                             | 10     | 10     | 10     | 10     | 10     | 10     |
|              | cutdt                | 0                                     | 0      | 0      | 0      | 0      | 0      | 0      | 0                                              | 0      | 0      | 0      | 0      | 0      | 0      |
|              | bldt                 | 0                                     | 0      | 0      | 0      | 0      | 0      | 0      | 0                                              | 0      | 0      | 0      | 0      | 0      | 0      |
|              | prec_acc_dt          | 60                                    | 60     | 60     | 60     | 60     | 60     | 60     | 60                                             | 60     | 60     | 60     | 60     | 60     | 60     |
|              | bucket_mm            | 1000                                  | 1000   | 1000   | 1000   | 1000   | 1000   | 1000   | 1000                                           | 1000   | 1000   | 1000   | 1000   | 1000   | 1000   |
|              | levsiz               | 59                                    | 59     | 59     | 59     | 59     | 59     | 59     | 59                                             | 59     | 59     | 59     | 59     | 59     | 59     |
|              | paerlev              | 29                                    | 29     | 29     | 29     | 29     | 29     | 29     | 29                                             | 29     | 29     | 29     | 29     | 29     | 29     |
|              | cam_abs_dim1         | 4                                     | 4      | 4      | 4      | 4      | 4      | 4      | 4                                              | 4      | 4      | 4      | 4      | 4      | 4      |
|              | cam_abs_dim2         | 45                                    | 45     | 45     | 45     | 45     | 45     | 45     | 45                                             | 45     | 45     | 45     | 45     | 45     | 45     |
|              | isfflx               | 1                                     | 1      | 1      | 1      | 1      | 1      | 1      | 1                                              | 1      | 1      | 1      | 1      | 1      | 1      |
|              | surface_input_source | 1                                     | 1      | 1      | 1      | 1      | 1      | 1      | 1                                              | 1      | 1      | 1      | 1      | 1      | 1      |
|              | num_soil_layers      | 4                                     | 4      | 4      | 4      | 4      | 4      | 4      | 4                                              | 4      | 4      | 4      | 4      | 4      | 4      |
|              | sst_update           | 1                                     | 1      | 1      | 1      | 1      | 1      | 1      | 1                                              | 1      | 1      | 1      | 1      | 1      | 1      |
|              | tmn_update           | 1                                     | 1      | 1      | 1      | 1      | 1      | 1      | 1                                              | 1      | 1      | 1      | 1      | 1      | 1      |
|              | lagday               | 150                                   | 150    | 150    | 150    | 150    | 150    | 150    | 150                                            | 150    | 150    | 150    | 150    | 150    | 150    |
|              | sst_skin             | 1                                     | 1      | 1      | 1      | 1      | 1      | 1      | 1                                              | 1      | 1      | 1      | 1      | 1      | 1      |
|              | usemonalb            | .True.                                | .True. | .True. | .True. | .True. | .True. | .True. | .True.                                         | .True. | .True. | .True. | .True. | .True. | .True. |
|              | rdmaxalb             | .True.                                | .True. | .True. | .True. | .True. | .True. | .True. | .True.                                         | .True. | .True. | .True. | .True. | .True. | .True. |
|              | slope_rad            | 1                                     | 1      | 1      | 1      | 1      | 1      | 1      | 1                                              | 1      | 1      | 1      | 1      | 1      | 1      |
| topo_shading | 1                    | 1                                     | 1      | 1      | 1      | 1      | 1      | 1      | 1                                              | 1      | 1      | 1      | 1      | 1      |        |
| shadlen      | 25000                | 25000                                 | 25000  | 25000  | 25000  | 25000  | 25000  | 25000  | 25000                                          | 25000  | 25000  | 25000  | 25000  | 25000  |        |
| noah_mp      | dveg                 |                                       | 2      | 2      | 4      | 2      | 2      | 4      |                                                | 2      | 2      | 4      | 2      | 2      | 4      |
|              | opt_crs              |                                       | 1      | 1      | 1      | 1      | 1      | 1      |                                                | 1      | 1      | 1      | 1      | 1      | 1      |
|              | opt_sfc              |                                       | 1      | 1      | 1      | 1      | 1      | 1      |                                                | 1      | 1      | 1      | 1      | 1      | 1      |
|              | opt_btr              |                                       | 1      | 1      | 1      | 1      | 1      | 1      |                                                | 1      | 1      | 1      | 1      | 1      | 1      |
|              | opt_run              |                                       | 3      | 3      | 1      | 3      | 3      | 1      |                                                | 3      | 3      | 1      | 3      | 3      | 1      |
|              | opt_frz              |                                       | 1      | 1      | 1      | 1      | 1      | 1      |                                                | 1      | 1      | 1      | 1      | 1      | 1      |
|              | opt_inf              |                                       | 1      | 1      | 1      | 1      | 1      | 1      |                                                | 1      | 1      | 1      | 1      | 1      | 1      |
|              | opt_rad              |                                       | 3      | 3      | 3      | 3      | 3      | 3      |                                                | 3      | 3      | 3      | 3      | 3      | 3      |
|              | opt_alb              |                                       | 2      | 2      | 2      | 2      | 2      | 2      |                                                | 2      | 2      | 2      | 2      | 2      | 2      |
|              | opt_snf              |                                       | 1      | 1      | 1      | 1      | 1      | 1      |                                                | 1      | 1      | 1      | 1      | 1      | 1      |
|              | opt_tbot             |                                       | 2      | 2      | 2      | 2      | 2      | 2      |                                                | 2      | 2      | 2      | 2      | 2      | 2      |
|              | opt_stc              |                                       | 1      | 1      | 1      | 1      | 1      | 1      |                                                | 1      | 1      | 1      | 1      | 1      | 1      |
|              | opt_gla              |                                       | 1      | 1      | 1      | 1      | 1      | 1      |                                                | 1      | 1      | 1      | 1      | 1      | 1      |
|              | opt_rsf              |                                       | 1      | 1      | 1      | 1      | 1      | 1      |                                                | 1      | 1      | 1      | 1      | 1      | 1      |
|              | opt_soil             |                                       | 1      | 1      | 1      | 1      | 1      | 1      |                                                | 1      | 1      | 1      | 1      | 1      | 1      |
|              | opt_pedo             |                                       | 1      | 1      | 1      | 1      | 1      | 1      |                                                | 1      | 1      | 1      | 1      | 1      | 1      |
|              | opt_crop             |                                       | 0      | 0      | 0      | 0      | 0      | 0      |                                                | 0      | 0      | 0      | 0      | 0      | 0      |

|                         |                          |                |
|-------------------------|--------------------------|----------------|
| time_control            |                          |                |
| run_days                | 6                        |                |
| run_hours               | 0                        |                |
| run_minutes             | 0                        |                |
| run_seconds             | 0                        |                |
| start_year              | 2016                     | 2016           |
| start_month             | 5                        | 5              |
| start_day               | 1                        | 1              |
| start_hour              | 0                        | 0              |
| start_minute            | 0                        | 0              |
| start_second            | 0                        | 0              |
| end_year                | 2016                     | 2016           |
| end_month               | 5                        | 5              |
| end_day                 | 7                        | 7              |
| end_hour                | 0                        | 0              |
| end_minute              | 0                        | 0              |
| end_second              | 0                        | 0              |
| interval_seconds        | 21600                    |                |
| input_from_file         | TRUE                     | TRUE           |
| history_interval        | 180                      | 180            |
| frames_per_outfile      | 8                        | 8              |
| restart                 | TRUE                     |                |
| restart_interval        | 1440                     |                |
| override_restart_timers | TRUE                     |                |
| write_hist_at_0h_rst    | TRUE                     |                |
| io_form_history         | 2                        |                |
| io_form_restart         | 2                        |                |
| io_form_input           | 2                        |                |
| io_form_boundary        | 2                        |                |
| debug_level             | 0                        |                |
| output_diagnostics      | 1                        |                |
| auxinput4_inname        | "wflowinp_d<domain>"     |                |
| auxinput4_interval      | 360                      | 360            |
| io_form_auxinput4       | 2                        |                |
| auxhist3_outname        | xtrm d<domain> <date>"   |                |
| io_form_auxhist3        | 2                        |                |
| auxhist3_interval       | 1440                     | 1440           |
| frames_per_auxhist3     | 6                        | 6              |
| auxhist4_outname        | hurlly d<domain> <date>" |                |
| io_form_auxhist4        | 2                        |                |
| auxhist4_interval       | 60                       | 60             |
| frames_per_auxhist4     | 144                      | 144            |
| l_auxhist8_outname      | rfdly d<domain> <date>"  |                |
| l_auxhist8_interval     | 1440                     | 1440           |
| l_io_form_auxhist8      | 2                        |                |
| l_frames_per_auxhist8   | 6                        | 6              |
| l_ofields_filename      | "iofields.txt"           | "iofields.txt" |
| domains                 |                          |                |
| time_step               | 90                       |                |
| time_step_fract_num     | 0                        |                |
| time_step_fract_den     | 1                        |                |
| max_dom                 | 2                        |                |
| s_we                    | 1                        | 1              |
| e_we                    | 540                      | 616            |
| s_sn                    | 1                        | 1              |
| e_sn                    | 363                      | 501            |
| s_vert                  | 1                        | 1              |
| e_vert                  | 45                       | 45             |
| dzbot                   | 50                       |                |
| max_dt                  | 1000                     |                |
| dzstretch_s             | 1.2                      |                |
| dzstretch_u             | 1.05                     |                |
| p_top_requested         | 5000                     |                |
| dx                      | 19567.24                 | 3913.447       |
| dy                      | 19567.24                 | 3913.447       |
| grid_id                 | 1                        | 2              |
| parent_id               | 0                        | 1              |
| i_parent_start          | 1                        | 205            |
| j_parent_start          | 1                        | 90             |
| parent_grid_ratio       | 1                        | 5              |
| parent_time_step_ratio  | 1                        | 5              |
| feedback                | 0                        |                |
| timeuth_option          | 0                        |                |
| nproc_x                 | -1                       |                |
| nproc_y                 | -1                       |                |
| dynamics                |                          |                |
| rk_ord                  | 3                        |                |
| iw_damping              | 1                        |                |
| diff_opt                | 1                        | 1              |
| km_opt                  | 4                        | 4              |
| diff_6th_opt            | 0                        | 0              |
| diff_6th_factor         | 0.12                     |                |
| base_temp               | 290                      |                |
| damp_opt                | 1                        |                |
| zdamp                   | 5000                     | 5000           |
| dampcoef                | 0.01                     | 0.01           |
| khdif                   | 0                        |                |
| kvdif                   | 0                        | 0              |
| non_hydrostatic         | TRUE                     | TRUE           |
| moist_adv_opt           | 1                        | 1              |
| scalar_adv_opt          | 1                        | 1              |
| gwd_opt                 | 1                        |                |
| bdy_control             |                          |                |
| spec_bdy_width          | 5                        |                |
| spec_zone               | 1                        |                |
| relax_zone              | 4                        |                |
| specified               | TRUE                     | FALSE          |
| nested                  | FALSE                    | TRUE           |
| namelist_quit           |                          |                |
| nio_tasks_per_group     | 0                        |                |
| nio_groups              | 0                        | 1              |
